# Supplementary material for: Complex Tissue Regeneration in Mammals Is Associated With Reduced Inflammatory Cytokines and an Influx of T Cells
Source: Front Immunol. 2020 Aug 7;11:1695. doi: 10.3389/fimmu.2020.01695 (PMC7427103; doi:10.3389/fimmu.2020.01695)
Supplement: Supplementary file 2 [file Table_1.XLSX]

## Sheet: FIGURE 2
IL-1a
One-Way ANOVA							Tukey-Kramer HSD
Source	Nparm	DF	Sum of Squares	F Ratio	Prob > F		Level				Least Sq Mean
Group	4	4	1.91874	2.6941	0.0505		Ac	A			0.845816
							Ap	A	B		0.559868
	Not Significant						Mm-UKY	A	B		0.554654
							Mm-Wild	A	B		0.49309
							Mm-Kenya		B		0.0418113
IL-1b
One-Way ANOVA							Tukey-Kramer HSD
Source	Nparm	DF	Sum of Squares	F Ratio	Prob > F		Level				Least Sq Mean
Group	4	4	17.7919	11.1476	<.0001		Ap	A			1.42684
							Mm-UKY		B		0.458429
	No pattern						Mm-Wild		B		0.29011
							Ac		B		-0.313274
							Mm-Kenya		B		-0.313274
IL-2
One-Way ANOVA							Tukey-Kramer HSD
Source	Nparm	DF	Sum of Squares	F Ratio	Prob > F		Level				Least Sq Mean
Group	4	4	15.5618	10.2704	<.0001		Mm-Wild	A			1.74523
							Mm-UKY		B		0.238327
	No pattern						Ap		B		0.176052
							Mm-Kenya		B		-0.306452
							Ac		B		-0.451733
IL-4
One-Way ANOVA							Tukey-Kramer HSD
Source	Nparm	DF	Sum of Squares	F Ratio	Prob > F		Level				Least Sq Mean
Group	4	4	12.2274	6.0004	0.0012		Ap	A			0.860858
							Mm-Wild	A			0.620131
	Wild > Lab						Mm-Kenya	A	B		0.260643
							Ac	A	B		-0.0193627
							Mm-UKY		B		-0.812197
IL-5
One-Way ANOVA							Tukey-Kramer HSD
Source	Nparm	DF	Sum of Squares	F Ratio	Prob > F		Level				Least Sq Mean
Group	4	4	8.1421	2.6302	0.0546		Mm-Wild	A			1.34302
							Mm-Kenya	A	B		0.977599
	Not Significant						Ap	A	B		0.80787
							Mm-UKY	A	B		0.368381
							Ac		B		-0.282699
IL-6
One-Way ANOVA							Tukey-Kramer HSD
Source	Nparm	DF	Sum of Squares	F Ratio	Prob > F		Level				Least Sq Mean
Group	4	4	13.5116	6.3072	0.0009		Mm-Wild	A	B		0.78213
							Ap	A			0.659725
	Wild > Lab						Mm-Kenya		B	C	-0.489998
							Mm-UKY			C	-0.597141
							Ac			C	-0.680478
IL-12
One-Way ANOVA							Tukey-Kramer HSD
Source	Nparm	DF	Sum of Squares	F Ratio	Prob > F		Level				Least Sq Mean
Group	4	4	5.11883	5.2103	0.0029		Mm-Wild	A			1.62941
							Ap	A			1.54125
	Wild > Lab						Mm-UKY	A	B		1.17382
							Mm-Kenya	A	B		0.935597
							Ac		B		0.420019
IL-17
One-Way ANOVA							Tukey-Kramer HSD
Source	Nparm	DF	Sum of Squares	F Ratio	Prob > F		Level				Least Sq Mean
Group	3	3	0.653922	1.1492	0.3487		Ap	A			0.573502
							Mm-Wild	A			0.395589
	Not Significant						Mm-UKY	A			0.256019
							Mm-Kenya	A			0.231961
CCL2
One-Way ANOVA							Tukey-Kramer HSD
Source	Nparm	DF	Sum of Squares	F Ratio	Prob > F		Level				Least Sq Mean
Group	4	4	7.7666	16.0344	<.0001		Ap	A			1.3968
							Mm-Wild	A			1.30726
	Wild > Lab						Mm-Kenya	A	B		1.06333
							Mm-UKY		B	C	0.583907
							Ac			C	0.0673536
CCL3
One-Way ANOVA							Tukey-Kramer HSD
Source	Nparm	DF	Sum of Squares	F Ratio	Prob > F		Level				Least Sq Mean
Group	4	4	3.53076	2.5886	0.0575		Ap	A			0.497149
							Mm-Wild	A	B		-0.0331901
	Not Significant						Ac	A	B		-0.0474315
							Mm-Kenya	A	B		-0.0798316
							Mm-UKY		B		-0.356942
CSF2
One-Way ANOVA							Tukey-Kramer HSD
Source	Nparm	DF	Sum of Squares	F Ratio	Prob > F		Level				Least Sq Mean
Group	4	4	5.16889	3.586	0.0171		Mm-Wild	A			0.425503
							Ap	A			0.0553239
	No pattern						Mm-Kenya	A			-0.578232
							Mm-UKY	A			-0.578232
							Ac	A			-0.578232
TNFa
One-Way ANOVA							Tukey-Kramer HSD
Source	Nparm	DF	Sum of Squares	F Ratio	Prob > F		Level				Least Sq Mean
Group	4	4	10.2657	23.8045	<.0001		Ap	A			0.516745
							Mm-Wild	A	B		0.133135
	Wild > Lab						Mm-Kenya		B		-0.217613
							Ac			C	-0.797239
							Mm-UKY			C	-0.797239
IFNg
One-Way ANOVA							Tukey-Kramer HSD
Source	Nparm	DF	Sum of Squares	F Ratio	Prob > F		Level				Least Sq Mean
Group	4	4	5.85132	3.2525	0.0255		Ap	A			0.692986
							Mm-UKY	A	B		0.401084
	No pattern						Mm-Kenya	A	B		0.148137
							Mm-Wild	A	B		-0.0385152
							Ac		B		-0.509617
CXCL1
One-Way ANOVA							Tukey-Kramer HSD
Source	Nparm	DF	Sum of Squares	F Ratio	Prob > F		Level				Least Sq Mean
Group	4	4	4.84676	4.0709	0.0097		Mm-Wild	A			1.16595
							Mm-UKY	A	B		0.654471
	No pattern						Mm-Kenya	A	B		0.571271
							Ap	A	B		0.369683
							Ac		B		-0.17134

## Sheet: FIGURE 3
IL-6
Day 1						Day 2						Day 10						Day 20
Tukey-Kramer HSD						Tukey-Kramer HSD						Tukey-Kramer HSD						Tukey-Kramer HSD
Level				Least Sq Mean		Level				Least Sq Mean		Level				Least Sq Mean		Level			Least Sq Mean
Mm-UKY	A			1.44442		Mm-UKY	A			1.42416		Ac	A			0.301322		Mm-Wild	A		0.277998
Mm-Wild	A	B		1.01705		Mm-Wild	A	B		1.09778		Mm-Wild	A			0.0157565		Ac	A		0.254563
Mm-Kenya		B		0.848511		Mm-Kenya		B		0.82249		Mm-UKY		B		-0.471875		Mm-UKY	A		-0.0938538
Ac			C	0.13982		Ac			C	0.335496		Mm-Kenya		B	C	-0.527886		Ap		B	-0.727325
Ap			C	0.108937		Ap			C	0.313304		Ap			C	-0.928017		Mm-Kenya		B	-0.974168
One-way ANOVA						One-way ANOVA						One-way ANOVA						One-way ANOVA
Source	Nparm	DF	Sum of Squares	F Ratio	Prob > F	Source	Nparm	DF	Sum of Squares	F Ratio	Prob > F	Source	Nparm	DF	Sum of Squares	F Ratio	Prob > F	Source	Nparm	DF	Sum of Squares	F Ratio	Prob > F
Group	4	4	9.68277	25.4218	<.0001	Group	4	4	6.61754	47.2378	<.0001	Group	4	4	6.99608	23.2998	<.0001	Group	4	4	10.9195	21.5029	<.0001
TNFa
Day 1						Day 2						Day 10						Day 20
Tukey-Kramer HSD						Tukey-Kramer HSD						Tukey-Kramer HSD						Tukey-Kramer HSD
Level				Least Sq Mean		Level					Least Sq Mean	Level				Least Sq Mean		Level					Least Sq Mean
Mm-Wild	A			0.708605		Mm-Wild	A				1.1694	Mm-Wild	A			0.178198		Mm-Wild	A				0.257848
Mm-UKY	A	B		0.329643		Mm-UKY		B			0.853455	Ac	A			0.0353646		Ac		B			0.0075985
Ap		B		0.24664		Ap			C		0.345627	Mm-UKY	A	B		-0.0649968		Mm-UKY		B			-0.0649968
Ac		B		5.5511e-17		Mm-Kenya			C		0.295882	Ap		B		-0.261299		Ap			C		-0.386264
Mm-Kenya			C	-0.928486		Ac				D	0.019909	Mm-Kenya			C	-0.785519		Mm-Kenya				D	-0.774867
One-way ANOVA						One-way ANOVA						One-way ANOVA						One-way ANOVA
Source	Nparm	DF	Sum of Squares	F Ratio	Prob > F	Source	Nparm	DF	Sum of Squares	F Ratio	Prob > F	Source	Nparm	DF	Sum of Squares	F Ratio	Prob > F	Source	Nparm	DF	Sum of Squares	F Ratio	Prob > F
Group	4	4	8.79568	39.6132	<.0001	Group	4	4	4.90207	54.9657	<.0001	Group	4	4	3.25507	27.9498	<.0001	Group	4	4	4.71983	67.7555	<.0001
IL-1B
Day 1						Day 2						Day 10						Day 20
Tukey-Kramer HSD						Tukey-Kramer HSD						Tukey-Kramer HSD						Tukey-Kramer HSD
Level			Least Sq Mean			Level			Least Sq Mean			Level				Least Sq Mean		Level					Least Sq Mean
Mm-Wild	A		0.579966			Mm-Wild	A		0.873205			Mm-Wild	A			0.150644		Mm-Wild	A				0.121368
Mm-UKY	A		0.371759			Mm-UKY	A		0.572884			Ac	A	B		-0.147364		Ac	A	B			-0.088509
Ac	A	B	0.146409			Mm-Kenya	A		0.44783			Mm-UKY		B		-0.50657		Mm-UKY		B	C		-0.42177
Mm-Kenya	A	B	0.0982517			Ac	A		0.347029			Ap			C	-1.02483		Mm-Kenya			C	D	-0.803839
Ap		B	-0.18708			Ap		B	-0.869647			Mm-Kenya			C	-1.16503		Ap				D	-1.04777
One-way ANOVA						One-way ANOVA						One-way ANOVA						One-way ANOVA
Source	Nparm	DF	Sum of Squares	F Ratio	Prob > F	Source	Nparm	DF	Sum of Squares	F Ratio	Prob > F	Source	Nparm	DF	Sum of Squares	F Ratio	Prob > F	Source	Nparm	DF	Sum of Squares	F Ratio	Prob > F
Group	4	4	2.47621	5.3875	0.0023	Group	4	4	16.6525	32.5118	<.0001	Group	4	4	7.96834	20.7034	<.0001	Group	4	4	7.38714	19.052	<.0001
IL-4
Day 1						Day 2						Day 10						Day 20
Tukey-Kramer HSD						Tukey-Kramer HSD						Tukey-Kramer HSD						Tukey-Kramer HSD
Level			Least Sq Mean			Level			Least Sq Mean			Level			Least Sq Mean			Level				Least Sq Mean
Mm-Wild	A		0.147429			Mm-Wild	A		0.211903			Mm-Wild	A		0.119474			Mm-Wild	A			0.534572
Mm-UKY		B	-0.273085			Ap	A	B	0.139759			Mm-UKY	A	B	-0.145818			Ac		B		-0.12655
Ac		B	-0.312083			Mm-Kenya	A	B	-0.0856895			Mm-Kenya	A	B	-0.202301			Ap		B	C	-0.411843
Ap		B	-0.327213			Ac	A	B	-0.100934			Ac		B	-0.459978			Mm-Kenya			C	-0.564514
Mm-Kenya		B	-0.380606			Mm-UKY		B	-0.109676			Ap		B	-0.494661			Mm-UKY			C	-0.588556
One-way ANOVA						One-way ANOVA						One-way ANOVA						One-way ANOVA
Source	Nparm	DF	Sum of Squares	F Ratio	Prob > F	Source	Nparm	DF	Sum of Squares	F Ratio	Prob > F	Source	Nparm	DF	Sum of Squares	F Ratio	Prob > F	Source	Nparm	DF	Sum of Squares	F Ratio	Prob > F
Group	4	4	0.983276	9.7055	<.0001	Group	4	4	0.609994	4.7991	0.0041	Group	4	4	1.6425	5.2271	0.0027	Column 1	4	4	4.64078	18.8948	<.0001
IL-12
Day 1						Day 2						Day 10						Day 20
Tukey-Kramer HSD						Tukey-Kramer HSD						Tukey-Kramer HSD						Tukey-Kramer HSD
Level				Least Sq Mean		Level			Least Sq Mean			Level			Least Sq Mean			Level				Least Sq Mean
Ap	A			1.16018		Ap	A		0.633197			Ap	A		0.262519			Ap	A			0.666282
Mm-Wild		B		0.138998		Mm-Kenya	A		0.417585			Mm-Kenya	A		0.0526591			Ac	A			0.663049
Mm-UKY		B		-0.003759		Mm-UKY	A		0.177984			Mm-UKY	A	B	-0.23271			Mm-Wild	A	B		0.0986422
Mm-Kenya			C	-0.74822		Mm-Wild	A		0.165975			Mm-Wild	A	B	-0.244459			Mm-UKY		B	C	-0.400938
Ac			C	-0.815309		Ac		B	-0.695295			Ac		B	-0.815309			Mm-Kenya			C	-0.777697
One-way ANOVA						One-way ANOVA						One-way ANOVA						One-way ANOVA
						Source	Nparm	DF	Sum of Squares	F Ratio	Prob > F	Source	Nparm	DF	Sum of Squares	F Ratio	Prob > F	Source	Nparm	DF	Sum of Squares	F Ratio	Prob > F
						Group	4	4	7.33432	14.218	<.0001	Group	4	4	4.84128	7.66	0.0002	Group	4	4	16.115	26.3278	<.0001
IL-17
Day 1						Day 2						Day 10						Day 20
Tukey-Kramer HSD						Tukey-Kramer HSD						Tukey-Kramer HSD						Tukey-Kramer HSD
Level			Least Sq Mean			Level				Least Sq Mean		Level				Least Sq Mean		Level			Least Sq Mean
Ap	A		0.789528			Ap	A			0.845308		Ap	A			-2.22e-16		Ap	A		0.852599
Mm-UKY		B	-0.628191			Mm-Kenya		B		-0.437437		Mm-Kenya		B		-0.242		Mm-Kenya		B	-0.666164
Mm-Kenya		B	-1.0655			Mm-UKY			C	-0.929962		Mm-UKY			C	-0.929962		Mm-UKY		B	-0.929962
One-way ANOVA						One-way ANOVA						One-way ANOVA						One-way ANOVA
Source	Nparm	DF	Sum of Squares	F Ratio	Prob > F	Source	Nparm	DF	Sum of Squares	F Ratio	Prob > F	Source	Nparm	DF	Sum of Squares	F Ratio	Prob > F	Source	Nparm	DF	Sum of Squares	F Ratio	Prob > F
Group	2	2	15.9415	45.8722	<.0001	Group	2	2	14.7549	93.5958	<.0001	Group	2	2	3.39054	441.778	<.0001	Group	2	2	19.4716	116.923	<.0001
CCL2
Day 1						Day 2						Day 10						Day 20
Tukey-Kramer HSD						Tukey-Kramer HSD						Tukey-Kramer HSD						Tukey-Kramer HSD
Level			Least Sq Mean			Level				Least Sq Mean		Level			Least Sq Mean			Level			Least Sq Mean
Mm-Wild	A		1.11071			Mm-Wild	A			1.26067		Mm-Wild	A		0.2378			Mm-Wild	A		0.586846
Mm-UKY	A		0.729481			Mm-Kenya	A	B		0.684087		Mm-UKY	A	B	-0.362705			Mm-UKY		B	-0.612473
Mm-Kenya	A		0.722538			Mm-UKY		B		0.534369		Mm-Kenya		B	-0.475547			Mm-Kenya		B	-0.737557
Ap		B	-0.197395			Ap			C	-0.590299		Ap		B	-0.777456			Ap		B	-0.862646
One-way ANOVA						One-way ANOVA						One-way ANOVA						One-way ANOVA
Source	Nparm	DF	Sum of Squares	F Ratio	Prob > F	Source	Nparm	DF	Sum of Squares	F Ratio	Prob > F	Source	Nparm	DF	Sum of Squares	F Ratio	Prob > F	Source	Nparm	DF	Sum of Squares	F Ratio	Prob > F
Group	3	3	7.69821	21.548	<.0001	Group	3	3	15.1784	33.4264	<.0001	Group	3	3	3.59295	7.0416	0.0015	Group	3	3	6.55785	11.6778	<.0001
CXCL1
Day 1						Day 2						Day 10						Day 20
Tukey-Kramer HSD						Tukey-Kramer HSD						Tukey-Kramer HSD						Tukey-Kramer HSD
Level			Least Sq Mean			Level				Least Sq Mean		Level			Least Sq Mean			Level			Least Sq Mean
Mm-Kenya	A		1.70624			Mm-Wild	A			2.13231		Mm-Wild	A		0.369231			Mm-Wild	A		0.420301
Mm-Wild	A		1.65872			Mm-Kenya	A			1.91183		Mm-Kenya	A		0.141519			Ap	A		0.0438222
Mm-UKY	A		1.40125			Mm-UKY		B		1.27516		Ap	A		-2.776e-17			Mm-Kenya		B	-0.405206
Ap		B	0.412414			Ap			C	0.261883		Mm-UKY		B	-0.697453			Mm-UKY		B	-0.492137
One-way ANOVA						One-way ANOVA						One-way ANOVA						One-way ANOVA
Source	Nparm	DF	Sum of Squares	F Ratio	Prob > F	Source	Nparm	DF	Sum of Squares	F Ratio	Prob > F	Source	Nparm	DF	Sum of Squares	F Ratio	Prob > F	Source	Nparm	DF	Sum of Squares	F Ratio	Prob > F
Group	3	3	9.49471	60.9947	<.0001	Group	3	3	17.8598	210.019	<.0001	Group	3	3	3.64124	15.229	<.0001	Group	3	3	3.42087	9.5447	0.0001

## Sheet: FIGURE S2 A
FIG 1B POSTHOC STATS
IL-1a																					Group							Group*Day
D1	Mm-uky	Mm-kenya	Mm-wild	Ac	Ap		D2	Mm-uky	Mm-kenya	Mm-wild	Ac	Ap		D3	Mm-uky	Mm-kenya	Mm-wild	Ac	Ap		Level					Least Sq Mean		Level																Least Sq Mean
Mm-uky							Mm-uky							Mm-uky							Mm-Kenya	A				0.33561		Mm-UKY,1	A	B	C	D	E	F	G	H								-0.445149
Mm-kenya	ns						Mm-kenya	ns						Mm-kenya	ns						Mm-Wild		B			-0.055908		Mm-Kenya,1	A															0.466992
Mm-wild	ns	ns					Mm-wild	ns	ns					Mm-wild	ns	ns					Ap		B			-0.0667402		Mm-Wild,1	A	B	C	D	E	F	G	H								-0.252115
Ac	ns	ns	ns				Ac	ns	S	ns				Ac	ns	ns	ns				Mm-UKY			C		-0.495958		Ac,1	A	B	C	D	E	F	G	H								-0.225492
Ap	ns	ns	ns	ns			Ap	ns	ns	ns	ns			Ap	ns	ns	ns	ns			Ac			C		-0.565555		Ap,1	A	B	C	D	E	F										0.0946702
																												Mm-UKY,2		B	C	D	E	F	G	H								-0.571563
D5	Mm-uky	Mm-kenya	Mm-wild	Ac	Ap		D10	Mm-uky	Mm-kenya	Mm-wild	Ac	Ap		D15	Mm-uky	Mm-kenya	Mm-wild	Ac	Ap		wild > lab							Mm-Kenya,2	A	B	C	D												0.322324
Mm-uky							Mm-uky							Mm-uky														Mm-Wild,2	A	B	C	D	E	F	G	H								0.0970223
Mm-kenya	ns						Mm-kenya	S						Mm-kenya	S													Ac,2					E	F	G	H								-0.677968
Mm-wild	ns	ns					Mm-wild	ns	ns					Mm-wild	S	ns												Ap,2	A	B	C	D	E											0.118744
Ac	ns	ns	ns				Ac	ns	S	ns				Ac	ns	S	ns											Mm-UKY,3	A	B	C	D	E	F	G	H								-0.472756
Ap	ns	ns	ns	ns			Ap	ns	ns	ns	ns			Ap	ns	ns	ns	ns										Mm-Kenya,3	A	B	C	D												0.322319
																												Mm-Wild,3	A	B	C	D	E	F	G	H								-0.22535
D20	Mm-uky	Mm-kenya	Mm-wild	Ac	Ap																							Ac,3		B		D	E	F	G	H								-0.604675
Mm-uky																												Ap,3	A	B	C	D	E	F										0.0463133
Mm-kenya	ns																											Mm-UKY,5	A	B	C	D	E	F	G	H								-0.363804
Mm-wild	ns	ns																										Mm-Kenya,5	A	B	C	D	E	F	G									0.0562515
Ac	ns	S	ns																									Mm-Wild,5	A	B	C	D	E	F	G	H								0.0206347
Ap	ns	ns	ns	ns																								Ac,5				D	E	F	G	H								-0.62737
																												Ap,5	A	B	C	D	E	F	G	H								-0.282806
																												Mm-UKY,10						F	G	H								-0.767447
																												Mm-Kenya,10	A	B	C													0.388994
																												Mm-Wild,10	A	B	C	D	E	F	G	H								0.0039474
																												Ac,10							G	H								-0.856485
																												Ap,10	A	B	C	D	E	F	G									-0.0573205
																												Mm-UKY,15								H								-0.917881
																												Mm-Kenya,15	A															0.429625
																												Mm-Wild,15	A	B	C	D	E	F	G									0.166258
																												Ac,15				D	E	F	G	H								-0.53536
																												Ap,15	A	B	C	D	E	F	G	H								-0.197192
																												Mm-UKY,20	A	B	C	D	E	F										0.0727916
																												Mm-Kenya,20	A		C													0.331789
																												Mm-Wild,20	A	B	C	D	E	F	G	H								-0.187711
																												Ac,20		B		D	E	F	G	H								-0.499972
																												Ap,20	A	B	C	D	E	F	G	H								-0.0720312
IL-1b																					Group							Group*Day
D1	Mm-uky	Mm-kenya	Mm-wild	Ac	Ap		D2	Mm-uky	Mm-kenya	Mm-wild	Ac	Ap		D3	Mm-uky	Mm-kenya	Mm-wild	Ac	Ap
Mm-uky							Mm-uky							Mm-uky
Mm-kenya							Mm-kenya							Mm-kenya
Mm-wild	ns						Mm-wild	ns						Mm-wild	ns
Ac							Ac							Ac
Ap	ns		ns				Ap	ns		ns				Ap	ns		ns
D5	Mm-uky	Mm-kenya	Mm-wild	Ac	Ap		D10	Mm-uky	Mm-kenya	Mm-wild	Ac	Ap		D15	Mm-uky	Mm-kenya	Mm-wild	Ac	Ap
Mm-uky							Mm-uky							Mm-uky
Mm-kenya							Mm-kenya							Mm-kenya
Mm-wild	ns						Mm-wild	S						Mm-wild	ns
Ac							Ac							Ac
Ap	ns		ns				Ap	ns		S				Ap	ns		ns
D20	Mm-uky	Mm-kenya	Mm-wild	Ac	Ap
Mm-uky
Mm-kenya
Mm-wild	ns
Ac
Ap	ns		ns
IL-2																					Group							Group*Day
D1	Mm-uky	Mm-kenya	Mm-wild	Ac	Ap		D2	Mm-uky	Mm-kenya	Mm-wild	Ac	Ap		D3	Mm-uky	Mm-kenya	Mm-wild	Ac	Ap		Level					Least Sq Mean		Level																Least Sq Mean
Mm-uky							Mm-uky							Mm-uky							Mm-UKY	A				0.281318		Mm-UKY,1	A	B	C	D	E	F										-0.193488
Mm-kenya	ns						Mm-kenya	ns						Mm-kenya	ns						Ac	A				0.261243		Mm-Kenya,1	A	B	C	D												0.273157
Mm-wild	ns	ns					Mm-wild	ns	ns					Mm-wild	S	ns					Mm-Kenya	A				0.0272085		Mm-Wild,1	A	B	C	D	E	F										-0.511626
Ac	ns	ns	ns				Ac	ns	ns	ns				Ac	ns	ns	S				Mm-Wild		B			-0.571989		Ac,1	A	B														0.558964
Ap	ns	ns	ns	ns			Ap	ns	ns	ns	S			Ap	ns	ns	ns	ns			Ap		B			-0.749577		Ap,1	A	B	C	D	E	F										-0.116257
																												Mm-UKY,2	A	B	C	D	E	F										-0.146942
D5	Mm-uky	Mm-kenya	Mm-wild	Ac	Ap		D10	Mm-uky	Mm-kenya	Mm-wild	Ac	Ap		D15	Mm-uky	Mm-kenya	Mm-wild	Ac	Ap		lab > wild							Mm-Kenya,2	A	B	C	D	E	F										-0.270463
Mm-uky							Mm-uky							Mm-uky														Mm-Wild,2	A	B	C	D	E	F										-0.586162
Mm-kenya	ns						Mm-kenya	ns						Mm-kenya	ns													Ac,2	A	B	C	D												0.224892
Mm-wild	ns	ns					Mm-wild	ns	ns					Mm-wild	ns	ns												Ap,2					E											-1.13497
Ac	ns	ns	ns				Ac	ns	ns	ns				Ac	ns	ns	ns											Mm-UKY,3	A															0.901242
Ap	S	S	ns	ns			Ap	ns	ns	ns	ns			Ap	ns	ns	ns	ns										Mm-Kenya,3	A	B	C	D	E	F										-0.236205
																												Mm-Wild,3				D	E	F										-1.237
D20	Mm-uky	Mm-kenya	Mm-wild	Ac	Ap																							Ac,3	A	B	C													0.457484
Mm-uky																												Ap,3	A	B	C	D	E	F										-0.227989
Mm-kenya	ns																											Mm-UKY,5	A	B														0.618905
Mm-wild	ns	ns																										Mm-Kenya,5	A	B														0.561067
Ac	ns	ns	ns																									Mm-Wild,5	A	B	C	D	E	F										-0.863476
Ap	S	ns	ns	S																								Ap,5			C	D	E	F										-0.749124
																												Ac,5	A	B	C	D	E	F										-8.049e-16
																												Mm-UKY,10	A	B	C	D	E	F										-0.030455
																												Mm-Kenya,10	A	B	C	D	E	F										-0.316773
																												Mm-Wild,10		B	C	D	E	F										-0.775551
																												Ac,10	A	B	C	D	E	F										-1.055e-15
																												Ap,10					E											-1.11375
																												Mm-UKY,15	A	B														0.421021
																												Mm-Kenya,15	A	B	C	D												0.124865
																												Mm-Wild,15	A	B	C	D	E	F										-0.108618
																												Ac,15	A	B	C	D												0.141834
																												Ap,15		B	C	D	E	F										-0.631414
																												Mm-UKY,20	A	B														0.398942
																												Mm-Kenya,20	A	B	C	D		F										0.054811
																												Mm-Wild,20	A	B	C	D	E	F										0.078508
																												Ac,20	A	B														0.445528
																												Ap,20					E	F										-1.27353
IL-4
D1	Mm-uky	Mm-kenya	Mm-wild	Ac	Ap		D2	Mm-uky	Mm-kenya	Mm-wild	Ac	Ap		D3	Mm-uky	Mm-kenya	Mm-wild	Ac	Ap		Level					Least Sq Mean		Level																Least Sq Mean
Mm-uky							Mm-uky							Mm-uky							Mm-UKY	A				0.428296		Ac,1	A	B	C	D	E	F	G									-0.701117
Mm-kenya							Mm-kenya							Mm-kenya							Mm-Kenya		B			-0.209243		Ac,10	A	B	C	D	E	F	G									-0.247547
Mm-wild							Mm-wild							Mm-wild							Mm-Wild		B			-0.222901		Ac,15							G									-1.03827
Ac							Ac							Ac							Ac		B	C		-0.487957		Ac,2	A	B	C	D	E	F	G									-0.508129
Ap							Ap							Ap							Ap			C		-0.620627		Ac,20	A	B	C	D	E	F	G									-0.408079
																												Ac,3	A	B	C	D	E	F	G									0.054824
D5	Mm-uky	Mm-kenya	Mm-wild	Ac	Ap		D10	Mm-uky	Mm-kenya	Mm-wild	Ac	Ap		D15	Mm-uky	Mm-kenya	Mm-wild	Ac	Ap		No pattern							Ac,5	A	B	C	D	E	F	G									-0.567383
Mm-uky							Mm-uky							Mm-uky														Ap,1		B	C	D	E	F	G									-0.547242
Mm-kenya							Mm-kenya							Mm-kenya														Ap,10			C	D	E	F	G									-0.694739
Mm-wild							Mm-wild							Mm-wild														Ap,15				D	E	F	G									-0.683311
Ac							Ac							Ac														Ap,2					E	F	G									-0.696061
Ap							Ap							Ap														Ap,20	A	B	C	D	E	F	G									-0.260226
																												Ap,3						F	G									-0.813402
D20	Mm-uky	Mm-kenya	Mm-wild	Ac	Ap																							Ap,5			C	D	E	F	G									-0.649411
Mm-uky																												Mm-Kenya,1	A	B	C	D	E	F										0.28614
Mm-kenya																												Mm-Kenya,10	A	B	C	D	E	F	G									0.083172
Mm-wild																												Mm-Kenya,15	A	B	C	D	E	F	G									-0.04852
Ac																												Mm-Kenya,2							G									-1.14569
Ap																												Mm-Kenya,20	A	B	C	D	E	F	G									-0.141954
																												Mm-Kenya,3	A	B	C	D	E	F	G									-0.220718
																												Mm-Kenya,5	A	B	C	D	E	F	G									-0.277125
																												Mm-UKY,1	A															0.696554
																												Mm-UKY,10	A	B	C	D	E	F										0.300034
																												Mm-UKY,15	A	B	C													0.366108
																												Mm-UKY,2	A	B	C	D	E	F	G									0.197864
																												Mm-UKY,20	A	B														0.42687
																												Mm-UKY,3	A	B	C	D	E											0.477447
																												Mm-UKY,5	A	B	C	D												0.533196
																												Mm-Wild,1	A	B	C	D	E	F	G									-0.371727
																												Mm-Wild,10	A	B	C	D	E	F	G									-0.310148
																												Mm-Wild,15	A	B	C	D	E	F	G									0.071637
																												Mm-Wild,2	A	B	C	D	E	F	G									-0.130868
																												Mm-Wild,20	A	B	C	D	E	F	G									0.26118
																												Mm-Wild,3	A	B	C	D	E	F	G									-0.671998
																												Mm-Wild,5	A	B	C	D	E	F	G									-0.408382
IL-5
D1	Mm-uky	Mm-kenya	Mm-wild	Ac	Ap		D2	Mm-uky	Mm-kenya	Mm-wild	Ac	Ap		D3	Mm-uky	Mm-kenya	Mm-wild	Ac	Ap		Level					Least Sq Mean		Level																Least Sq Mean
Mm-uky							Mm-uky							Mm-uky							Mm-Kenya	A				0.340179		Ac,1				D	E	F	G	H								-0.984015
Mm-kenya							Mm-kenya							Mm-kenya							Mm-UKY	A	B			0.246403		Ac,10	A	B	C	D	E	F	G	H								-0.447981
Mm-wild							Mm-wild							Mm-wild							Mm-Wild		B			-0.120984		Ac,15					E	F	G	H								-0.923034
Ac							Ac							Ac							Ac			C		-0.61867		Ac,2	A	B	C	D	E	F	G	H								-0.660166
Ap							Ap							Ap							Ap			C		-0.878477		Ac,20	A	B	C	D	E	F	G	H								-0.495183
																												Ac,3	A	B	C	D	E	F	G									-0.079963
D5	Mm-uky	Mm-kenya	Mm-wild	Ac	Ap		D10	Mm-uky	Mm-kenya	Mm-wild	Ac	Ap		D15	Mm-uky	Mm-kenya	Mm-wild	Ac	Ap		Non-regenerator > regenerator							Ac,5	A	B	C	D	E	F	G	H								-0.74035
Mm-uky							Mm-uky							Mm-uky														Ap,1		B	C	D	E	F	G	H								-0.61063
Mm-kenya							Mm-kenya							Mm-kenya														Ap,10			C	D	E	F	G	H								-0.794592
Mm-wild							Mm-wild							Mm-wild														Ap,15					E	F	G	H								-0.86643
Ac							Ac							Ac														Ap,2							G	H								-1.12298
Ap							Ap							Ap														Ap,20	A	B	C	D	E	F	G	H								-0.465298
																												Ap,3						F	G	H								-1.01605
D20	Mm-uky	Mm-kenya	Mm-wild	Ac	Ap																							Ap,5								H								-1.27336
Mm-uky																												Mm-Kenya,1	A	B	C													0.408198
Mm-kenya																												Mm-Kenya,10	A	B														0.433191
Mm-wild																												Mm-Kenya,15	A															0.461088
Ac																												Mm-Kenya,2	A	B	C	D	E											0.288058
Ap																												Mm-Kenya,20	A															0.484724
																												Mm-Kenya,3	A	B	C	D	E											0.303091
																												Mm-Kenya,5	A	B	C	D	E	F	G									0.002903
																												Mm-UKY,1	A	B	C	D	E											0.270241
																												Mm-UKY,10	A	B	C	D	E											0.195837
																												Mm-UKY,15	A	B	C	D												0.243395
																												Mm-UKY,2	A	B	C	D												0.336215
																												Mm-UKY,20	A	B	C	D												0.22785
																												Mm-UKY,3	A	B	C	D	E	F										0.121601
																												Mm-UKY,5	A	B	C	D												0.32968
																												Mm-Wild,1	A	B	C	D	E	F	G	H								-0.047984
																												Mm-Wild,10	A	B	C	D	E	F	G									0.061389
																												Mm-Wild,15	A	B	C	D	E	F	G	H								-0.049305
																												Mm-Wild,2	A	B	C	D	E	F	G	H								-0.300459
																												Mm-Wild,20	A	B	C	D	E	F	G	H								-0.003585
																												Mm-Wild,3	A	B	C	D	E	F	G	H								-0.324883
																												Mm-Wild,5	A	B	C	D	E	F	G	H								-0.182062
IL-6																					Group							Group*Day
D1	Mm-uky	Mm-kenya	Mm-wild	Ac	Ap		D2	Mm-uky	Mm-kenya	Mm-wild	Ac	Ap		D3	Mm-uky	Mm-kenya	Mm-wild	Ac	Ap		Level					Least Sq Mean		Level																Least Sq Mean
Mm-uky							Mm-uky							Mm-uky							Mm-UKY	A				0.78483		Mm-UKY,1	A															1.53206
Mm-kenya	ns						Mm-kenya	ns						Mm-kenya	ns						Mm-Kenya	A				0.641758		Mm-Kenya,1	A															1.40685
Mm-wild	ns	ns					Mm-wild	ns	ns					Mm-wild	ns	ns					Mm-Wild		B			0.190365		Mm-Wild,1	A	B	C	D	E	F	G	H								0.183063
Ac	S	S	ns				Ac	S	ns	ns				Ac	ns	ns	ns				Ac			C		-0.319069		Ac,1				D	E	F	G	H	I							-0.641789
Ap	S	S	ns	ns			Ap	S	ns	ns	ns			Ap	S	S	ns	ns			Ap				D	-0.860158		Ap,1					E	F	G	H	I							-0.654973
																												Mm-UKY,2	A	B														1.31968
D5	Mm-uky	Mm-kenya	Mm-wild	Ac	Ap		D10	Mm-uky	Mm-kenya	Mm-wild	Ac	Ap		D15	Mm-uky	Mm-kenya	Mm-wild	Ac	Ap		non-regenerator > regenerator							Mm-Kenya,2	A	B	C	D	E	F	G									0.264174
Mm-uky							Mm-uky							Mm-uky														Mm-Wild,2	A	B	C	D	E	F	G	H	I							0.193237
Mm-kenya	ns						Mm-kenya	ns						Mm-kenya	ns													Ac,2			C	D	E	F	G	H	I							-0.330843
Mm-wild	ns	ns					Mm-wild	ns	ns					Mm-wild	ns	ns												Ap,2						F	G	H	I							-0.952925
Ac	ns	ns	ns				Ac	ns	ns	ns				Ac	na	S	S											Mm-UKY,3	A	B	C													0.938396
Ap	S	ns	ns	ns			Ap	ns	S	ns	ns			Ap	ns	S	S	ns										Mm-Kenya,3	A	B	C	D	E											0.566606
																												Mm-Wild,3			C	D	E	F	G	H	I							-0.313695
D20	Mm-uky	Mm-kenya	Mm-wild	Ac	Ap																							Ac,3	A	B	C	D	E	F	G	H								0.125101
Mm-uky																												Ap,3								H	I							-1.11058
Mm-kenya	ns																											Mm-UKY,5	A	B	C	D												0.702935
Mm-wild	ns	ns																										Mm-Kenya,5		B	C	D	E	F	G	H	I							-0.107581
Ac	ns	ns	ns																									Mm-Wild,5	A	B	C	D	E	F	G	H	I							-0.051556
Ap	ns	ns	ns	ns																								Ac,5			C	D	E	F	G	H	I							-0.424591
																												Ap,5									I							-1.20941
																												Mm-UKY,10	A	B	C	D	E	F	G	H								0.122115
																												Mm-Kenya,10	A	B	C	D												0.662011
																												Mm-Wild,10	A	B	C	D	E	F										0.380145
																												Ac,10		B	C	D	E	F	G	H	I							-0.095499
																												Ap,10						F	G	H	I							-0.840338
																												Mm-UKY,15		B	C	D	E	F	G									0.091953
																												Mm-Kenya,15	A	B														1.08794
																												Mm-Wild,15	A	B	C	D												0.745593
																												Ac,15					E	F	G	H	I							-0.657185
																												Ap,15							G	H	I							-0.953523
																												Mm-UKY,20	A	B	C													0.786673
																												Mm-Kenya,20	A	B	C	D												0.61231
																												Mm-Wild,20	A	B	C	D	E	F	G	H	I							0.195767
																												Ac,20			C	D	E	F	G	H	I							-0.208675
																												Ap,20			C	D	E	F	G	H	I							-0.299351
IL-12																					Group							Group*Day
D1	Mm-uky	Mm-kenya	Mm-wild	Ac	Ap		D2	Mm-uky	Mm-kenya	Mm-wild	Ac	Ap		D3	Mm-uky	Mm-kenya	Mm-wild	Ac	Ap		Level					Least Sq Mean		Level																Least Sq Mean
Mm-uky							Mm-uky							Mm-uky							Ac	A				0.789108		Mm-UKY,1	A	B	C	D	E	F										-0.125914
Mm-kenya	ns						Mm-kenya	ns						Mm-kenya	ns						Mm-Kenya		B			0.293961		Mm-Kenya,1	A	B	C	D												0.765785
Mm-wild	ns	ns					Mm-wild	ns	ns					Mm-wild	ns	ns					Mm-Wild			C		-0.378591		Mm-Wild,1		B	C	D	E	F										-0.542497
Ac	ns	ns	ns				Ac	ns	ns	ns				Ac	ns	ns	S				Ap			C		-0.523121		Ac,1	A	B	C	D	E	F										0.465478
Ap	ns	ns	ns	ns			Ap	ns	ns	ns	S			Ap	ns	ns	ns	S			Mm-UKY			C		-0.58492		Ap,1			C	D	E	F										-0.443096
																												Mm-UKY,2		B	C	D	E	F										-0.544641
D5	Mm-uky	Mm-kenya	Mm-wild	Ac	Ap		D10	Mm-uky	Mm-kenya	Mm-wild	Ac	Ap		D15	Mm-uky	Mm-kenya	Mm-wild	Ac	Ap		no relation							Mm-Kenya,2	A	B	C	D	E	F										-0.040622
Mm-uky							Mm-uky							Mm-uky														Mm-Wild,2		B	C	D	E	F										-0.658102
Mm-kenya	ns						Mm-kenya	ns						Mm-kenya	ns													Ac,2	A	B	C	D												0.764382
Mm-wild	ns	ns					Mm-wild	ns	ns					Mm-wild	ns	ns												Ap,2					E	F										-0.673568
Ac	ns	ns	ns				Ac	S	ns	ns				Ac	S	ns	ns											Mm-UKY,3	A	B	C	D	E	F										-0.366096
Ap	ns	ns	ns	ns			Ap	ns	ns	ns	S			Ap	ns	ns	ns	ns										Mm-Kenya,3	A	B	C	D	E	F										0.169525
																												Mm-Wild,3					E	F										-0.977198
D20	Mm-uky	Mm-kenya	Mm-wild	Ac	Ap																							Ac,3	A															1.25041
Mm-uky																												Ap,3			C	D	E	F										-0.604367
Mm-kenya	ns																											Mm-UKY,5			C	D	E	F										-0.672023
Mm-wild	ns	ns																										Mm-Kenya,5	A	B	C	D	E	F										0.112732
Ac	S	ns	ns																									Mm-Wild,5	A	B	C	D	E	F										-0.517307
Ap	ns	ns	ns	ns																								Ac,5	A	B	C	D	E											0.627329
																												Ap,5			C	D	E	F										-0.504845
																												Mm-UKY,10						F										-1.03516
																												Mm-Kenya,10	A	B	C	D	E	F										0.23293
																												Mm-Wild,10	A	B	C	D	E	F										-0.130775
																												Ac,10	A	B														1.0034
																												Ap,10			C	D	E	F										-0.557793
																												Mm-UKY,15				D	E	F										-0.669621
																												Mm-Kenya,15	A	B	C	D	E	F										0.430742
																												Mm-Wild,15	A	B	C	D	E	F										0.021603
																												Ac,15	A	B	C													0.606317
																												Ap,15			C	D	E	F										-0.535745
																												Mm-UKY,20				D	E	F										-0.68098
																												Mm-Kenya,20	A	B	C	D	E	F										0.386635
																												Mm-Wild,20	A	B	C	D	E	F										0.154139
																												Ac,20	A	B														0.806437
																												Ap,20	A	B	C	D	E	F										-0.342432
IL-17	Not measured in Ac																											Group*Day
D1	Mm-uky	Mm-kenya	Mm-wild	Ac	Ap		D2	Mm-uky	Mm-kenya	Mm-wild	Ac	Ap		D3	Mm-uky	Mm-kenya	Mm-wild	Ac	Ap		Level					Least Sq Mean		Level																Least Sq Mean
Mm-uky							Mm-uky							Mm-uky							Mm-Wild	A				-0.602796		Mm-UKY,1	A	B	C	D												-0.92241
Mm-kenya	ns						Mm-kenya	ns						Mm-kenya	ns						Mm-Kenya	A				-0.792685		Mm-Kenya,1	A	B	C	D												-0.351133
Mm-wild	ns	ns					Mm-wild	ns	ns					Mm-wild	ns	ns					Mm-UKY	A	B			-0.943671		Mm-Wild,1	A	B	C	D												-0.447874
Ac							Ac							Ac							Ap		B			-1.15116		Ap,1	A	B	C	D												-0.755587
Ap	ns	ns	ns				Ap	ns	ns	ns				Ap	ns	ns	ns											Mm-UKY,2	A	B	C	D												-0.938425
																												Mm-Kenya,2		B	C	D												-1.21968
D5	Mm-uky	Mm-kenya	Mm-wild	Ac	Ap		D10	Mm-uky	Mm-kenya	Mm-wild	Ac	Ap		D15	Mm-uky	Mm-kenya	Mm-wild	Ac	Ap		Non-regenerators > regenerators							Mm-Wild,2	A	B	C	D												-0.717087
Mm-uky							Mm-uky							Mm-uky														Ap,2		B	C	D												-1.1317
Mm-kenya	ns						Mm-kenya	ns						Mm-kenya	ns													Mm-UKY,3	A	B	C	D												-0.902531
Mm-wild	ns	ns					Mm-wild	ns	ns					Mm-wild	ns	ns												Mm-Kenya,3		B	C	D												-1.21968
Ac							Ac							Ac														Mm-Wild,3	A	B	C	D												-1.08215
Ap	ns	ns	ns				Ap	ns	ns	ns				Ap	ns	ns	ns											Ap,3				D												-1.42537
																												Mm-UKY,5	A	B	C	D												-1.13826
D20	Mm-uky	Mm-kenya	Mm-wild	Ac	Ap																							Mm-Kenya,5	A															0.151326
Mm-uky																												Mm-Wild,5	A	B	C	D												-0.978854
Mm-kenya	ns																											Ap,5	A	B	C	D												-0.526668
Mm-wild	ns	ns																										Mm-UKY,10	A	B	C	D												-0.821576
Ac																												Mm-Kenya,10	A	B	C	D												-0.808352
Ap	S	S	S																									Mm-Wild,10	A	B	C	D												-0.928723
																												Ap,10				D												-1.45629
																												Mm-UKY,15			C	D												-1.25259
																												Mm-Kenya,15	A	B	C	D												-1.044
																												Mm-Wild,15	A	B	C													-0.161465
																												Ap,15		B	C	D												-1.12503
																												Mm-UKY,20	A	B	C	D												-0.629908
																												Mm-Kenya,20		B	C	D												-1.05727
																												Mm-Wild,20	A	B														0.096578
																												Ap,20				D												-1.6375
CCL2 (MCP-1)																					Group							Group*Day
D1	Mm-uky	Mm-kenya	Mm-wild	Ac	Ap		D2	Mm-uky	Mm-kenya	Mm-wild	Ac	Ap		D3	Mm-uky	Mm-kenya	Mm-wild	Ac	Ap		Level					Least Sq Mean		Level																Least Sq Mean
Mm-uky							Mm-uky							Mm-uky							Ac	A				0.259825		Mm-UKY,1	A	B														0.104663
Mm-kenya	ns						Mm-kenya	ns						Mm-kenya	ns						Mm-UKY	A	B			-0.0858278		Mm-Kenya,1	A	B														0.268978
Mm-wild	ns	ns					Mm-wild	ns	ns					Mm-wild	ns	ns					Mm-Wild		B			-0.200787		Mm-Wild,1	A	B														-0.0100299
Ac	ns	ns	ns				Ac	ns	ns	ns				Ac	ns	ns	ns				Mm-Kenya		B			-0.25723		Ac,1	A	B														0.289894
Ap	ns	ns	ns	ns			Ap	ns	ns	ns	ns			Ap	ns	ns	ns	ns			Ap		B			-0.26876		Ap,1	A	B														0.0346922
																												Mm-UKY,2	A	B														0.121846
D5	Mm-uky	Mm-kenya	Mm-wild	Ac	Ap		D10	Mm-uky	Mm-kenya	Mm-wild	Ac	Ap		D15	Mm-uky	Mm-kenya	Mm-wild	Ac	Ap									Mm-Kenya,2	A	B														-0.731866
Mm-uky							Mm-uky							Mm-uky							no relation							Mm-Wild,2	A	B														-0.35135
Mm-kenya	ns						Mm-kenya	ns						Mm-kenya	ns													Ac,2	A	B														0.222841
Mm-wild	ns	ns					Mm-wild	ns	ns					Mm-wild	ns	ns												Ap,2	A	B														-0.274958
Ac	ns	ns	ns				Ac	ns	ns	ns				Ac	ns	ns	ns											Mm-UKY,3	A	B														0.111423
Ap	ns	ns	ns	ns			Ap	ns	ns	ns	ns			Ap	ns	ns	ns	ns										Mm-Kenya,3	A	B														-0.727671
																												Mm-Wild,3		B														-0.947127
D20	Mm-uky	Mm-kenya	Mm-wild	Ac	Ap																							Ac,3	A	B														0.569998
Mm-uky																												Ap,3	A	B														-0.312165
Mm-kenya	ns																											Mm-UKY,5	A	B														-0.112353
Mm-wild	ns	ns																										Mm-Kenya,5	A	B														0.25984
Ac	ns	ns	ns																									Mm-Wild,5	A	B														-0.200979
Ap	ns	ns	ns	ns																								Ac,5	A	B														0.235341
																												Ap,5	A	B														-0.18573
																												Mm-UKY,10	A	B														-0.298659
																												Mm-Kenya,10	A	B														-0.236077
																												Mm-Wild,10	A	B														-0.147687
																												Ac,10	A	B														-0.0058216
																												Ap,10	A	B														-0.283737
																												Mm-UKY,15	A	B														-0.429502
																												Mm-Kenya,15	A	B														-0.331151
																												Mm-Wild,15	A	B														0.28805
																												Ac,15	A	B														0.0451939
																												Ap,15	A	B														-0.424137
																												Mm-UKY,20	A	B														-0.0982132
																												Mm-Kenya,20	A	B														-0.302662
																												Mm-Wild,20	A	B														-0.0363884
																												Ac,20	A															0.461331
																												Ap,20	A	B														-0.435283
CCL3 (MIP1a)
D1	Mm-uky	Mm-kenya	Mm-wild	Ac	Ap		D2	Mm-uky	Mm-kenya	Mm-wild	Ac	Ap		D3	Mm-uky	Mm-kenya	Mm-wild	Ac	Ap		Level					Least Sq Mean		Level																Least Sq Mean
Mm-uky							Mm-uky							Mm-uky							Mm-UKY	A				0.123341		Ac,1							G	H								-0.827105
Mm-kenya	ns						Mm-kenya	ns						Mm-kenya	ns						Mm-Wild	A				0.0521277		Ac,10				D	E	F	G	H								-0.660285
Mm-wild	ns	ns					Mm-wild	ns	ns					Mm-wild	ns	ns					Mm-Kenya		B			-0.347444		Ac,15							G	H								-0.733707
Ac	ns	ns	ns				Ac	ns	ns	ns				Ac	ns	ns	ns				Ap			C		-0.589625		Ac,2				D	E	F	G	H								-0.661162
Ap	ns	ns	ns	ns			Ap	ns	ns	ns	ns			Ap	ns	ns	ns	ns			Ac			C		-0.713583		Ac,20			C	D	E	F	G	H								-0.497282
																												Ac,3						F	G	H								-0.795508
D5	Mm-uky	Mm-kenya	Mm-wild	Ac	Ap		D10	Mm-uky	Mm-kenya	Mm-wild	Ac	Ap		D15	Mm-uky	Mm-kenya	Mm-wild	Ac	Ap		non-regenerator > regenerator							Ac,5							G	H								-0.820033
Mm-uky							Mm-uky							Mm-uky														Ap,1		B	C	D	E	F	G	H								-0.385978
Mm-kenya	ns						Mm-kenya	ns						Mm-kenya	ns													Ap,10				D	E	F	G	H								-0.594257
Mm-wild	ns	ns					Mm-wild	ns	ns					Mm-wild	ns	ns												Ap,15				D	E	F	G	H								-0.504087
Ac	ns	ns	ns				Ac	ns	ns	ns				Ac	ns	ns	ns											Ap,2	A	B	C	D	E	F	G	H								-0.357882
Ap	ns	ns	ns	ns			Ap	ns	ns	ns	ns			Ap	ns	ns	ns	ns										Ap,20					E	F	G	H								-0.742622
																												Ap,3								H								-0.933497
D20	Mm-uky	Mm-kenya	Mm-wild	Ac	Ap																							Ap,5					E	F	G	H								-0.609052
Mm-uky																												Mm-Kenya,1			C	D	E	F	G	H								-0.583859
Mm-kenya	ns																											Mm-Kenya,10	A	B	C	D	E	F	G	H								-0.466976
Mm-wild	ns	ns																										Mm-Kenya,15	A	B	C	D	E	F	G	H								-0.289293
Ac	ns	ns	ns																									Mm-Kenya,2		B	C	D	E	F	G	H								-0.573119
Ap	ns	ns	ns	ns																								Mm-Kenya,20	A	B	C	D	E	F										0.0379548
																												Mm-Kenya,3	A	B	C	D	E	F	G	H								-0.462838
																												Mm-Kenya,5	A	B	C	D	E	F	G									-0.0939807
																												Mm-UKY,1	A	B	C													0.296057
																												Mm-UKY,10	A	B	C	D	E	F	G									-0.0366683
																												Mm-UKY,15	A															0.295351
																												Mm-UKY,2	A	B	C	D	E	F	G									-0.0659242
																												Mm-UKY,20	A	B														0.242559
																												Mm-UKY,3	A	B	C	D	E	F	G									-0.0164872
																												Mm-UKY,5	A	B	C	D	E											0.148502
																												Mm-Wild,1	A	B	C	D	E	F	G									0.0572184
																												Mm-Wild,10	A	B	C	D												0.257908
																												Mm-Wild,15	A	B	C	D	E	F										0.157196
																												Mm-Wild,2	A	B	C	D	E	F	G	H								-0.0779147
																												Mm-Wild,20	A	B	C	D	E	F	G	H								-0.175516
																												Mm-Wild,3	A	B	C	D	E											0.17233
																												Mm-Wild,5	A	B	C	D	E	F	G	H								-0.0263277
CCL5 (RANTES)																					Group							Group*Day
D1	Mm-uky	Mm-kenya	Mm-wild	Ac	Ap		D2	Mm-uky	Mm-kenya	Mm-wild	Ac	Ap		D3	Mm-uky	Mm-kenya	Mm-wild	Ac	Ap
Mm-uky							Mm-uky							Mm-uky
Mm-kenya	ns						Mm-kenya	ns						Mm-kenya	ns
Mm-wild	ns	ns					Mm-wild	ns	S					Mm-wild	ns	S
Ac							Ac							Ac
Ap							Ap							Ap
D5	Mm-uky	Mm-kenya	Mm-wild	Ac	Ap		D10	Mm-uky	Mm-kenya	Mm-wild	Ac	Ap		D15	Mm-uky	Mm-kenya	Mm-wild	Ac	Ap
Mm-uky							Mm-uky							Mm-uky
Mm-kenya	S						Mm-kenya	S						Mm-kenya	S
Mm-wild	ns	S					Mm-wild	ns	S					Mm-wild	ns	S
Ac							Ac							Ac
Ap							Ap							Ap
D20	Mm-uky	Mm-kenya	Mm-wild	Ac	Ap
Mm-uky
Mm-kenya	ns
Mm-wild	S	S
Ac
Ap
CSF2 (GM-CSF)																					Group							Group*Day
D1	Mm-uky	Mm-kenya	Mm-wild	Ac	Ap		D2	Mm-uky	Mm-kenya	Mm-wild	Ac	Ap		D3	Mm-uky	Mm-kenya	Mm-wild	Ac	Ap
Mm-uky							Mm-uky							Mm-uky
Mm-kenya							Mm-kenya							Mm-kenya
Mm-wild							Mm-wild							Mm-wild
Ac							Ac							Ac
Ap							Ap							Ap
D5	Mm-uky	Mm-kenya	Mm-wild	Ac	Ap		D10	Mm-uky	Mm-kenya	Mm-wild	Ac	Ap		D15	Mm-uky	Mm-kenya	Mm-wild	Ac	Ap
Mm-uky							Mm-uky							Mm-uky
Mm-kenya							Mm-kenya							Mm-kenya
Mm-wild							Mm-wild							Mm-wild
Ac							Ac							Ac
Ap							Ap							Ap
D20	Mm-uky	Mm-kenya	Mm-wild	Ac	Ap
Mm-uky
Mm-kenya
Mm-wild
Ac
Ap
TNFa																					Group							Group*Day
D1	Mm-uky	Mm-kenya	Mm-wild	Ac	Ap		D2	Mm-uky	Mm-kenya	Mm-wild	Ac	Ap		D3	Mm-uky	Mm-kenya	Mm-wild	Ac	Ap		Level					Least Sq Mean		Level																Least Sq Mean
Mm-uky							Mm-uky							Mm-uky							Mm-UKY	A				0.712646		Mm-UKY,1	A	B	C	D	E											0.647073
Mm-kenya	ns						Mm-kenya	S						Mm-kenya	ns						Ac	A				0.635365		Mm-Kenya,1	A	B	C	D	E											0.358203
Mm-wild	ns	ns					Mm-wild	ns	ns					Mm-wild	ns	ns					Mm-Wild		B			-0.165755		Mm-Wild,1	A	B	C	D	E											-0.0536168
Ac	ns	ns	ns				Ac	ns	ns	ns				Ac	ns	ns	S				Mm-Kenya		B			-0.199549		Ac,1	A	B	C	D	E											0.725291
Ap	ns	ns	ns	ns			Ap	ns	ns	ns	ns			Ap	ns	ns	ns	ns			Ap		B			-0.233908		Ap,1	A	B	C	D	E											0.0918755
																												Mm-UKY,2	A	B														0.863685
D5	Mm-uky	Mm-kenya	Mm-wild	Ac	Ap		D10	Mm-uky	Mm-kenya	Mm-wild	Ac	Ap		D15	Mm-uky	Mm-kenya	Mm-wild	Ac	Ap		Lab > Wild							Mm-Kenya,2					E											-0.595337
Mm-uky							Mm-uky							Mm-uky														Mm-Wild,2	A	B	C	D	E											-0.293721
Mm-kenya	ns						Mm-kenya	ns						Mm-kenya	ns													Ac,2	A	B	C	D	E											0.714904
Mm-wild	ns	ns					Mm-wild	ns	ns					Mm-wild	ns	ns												Ap,2	A	B	C	D	E											-0.156063
Ac	ns	ns	ns				Ac	ns	ns	ns				Ac	ns	ns	ns											Mm-UKY,3	A	B	C	D												0.765437
Ap	ns	ns	ns	ns			Ap	ns	ns	ns	ns			Ap	ns	ns	ns	ns										Mm-Kenya,3		B	C	D	E											-0.438125
																												Mm-Wild,3				D	E											-0.622173
D20	Mm-uky	Mm-kenya	Mm-wild	Ac	Ap																							Ac,3	A	B	C													0.810663
Mm-uky																												Ap,3		B	C	D	E											-0.283877
Mm-kenya	S																											Mm-UKY,5	A	B	C													0.815492
Mm-wild	ns	ns																										Mm-Kenya,5	A	B	C	D	E											0.0818227
Ac	ns	S	ns																									Mm-Wild,5	A	B	C	D	E											-0.401816
Ap	ns	ns	ns	ns																								Ac,5	A	B	C	D	E											0.442735
																												Ap,5		B	C	D	E											-0.291646
																												Mm-UKY,10	A	B	C	D	E											0.70168
																												Mm-Kenya,10	A	B	C	D	E											-0.237212
																												Mm-Wild,10	A	B	C	D	E											-0.0823115
																												Ac,10	A	B	C	D	E											0.510961
																												Ap,10	A	B	C	D	E											-0.186846
																												Mm-UKY,15	A	B	C	D	E											0.429671
																												Mm-Kenya,15	A	B	C	D	E											-0.19125
																												Mm-Wild,15	A	B	C	D	E											0.241075
																												Ac,15	A	B	C	D	E											0.481923
																												Ap,15					E											-0.414078
																												Mm-UKY,20	A															0.76548
																												Mm-Kenya,20			C	D	E											-0.374944
																												Mm-Wild,20	A	B	C	D	E											0.0522787
																												Ac,20	A															0.76108
																												Ap,20	A	B	C	D	E											-0.396723
IFNg																					Group							Group*Day
D1	Mm-uky	Mm-kenya	Mm-wild	Ac	Ap		D2	Mm-uky	Mm-kenya	Mm-wild	Ac	Ap		D3	Mm-uky	Mm-kenya	Mm-wild	Ac	Ap		Level					Least Sq Mean		Level																Least Sq Mean
Mm-uky							Mm-uky							Mm-uky							Mm-Kenya	A				0.367314		Mm-UKY,1						F	G	H								-1.00549
Mm-kenya	ns						Mm-kenya	S						Mm-kenya	S						Ap		B			-0.343052		Mm-Kenya,1	A															0.734104
Mm-wild	S	ns					Mm-wild	ns	ns					Mm-wild	ns	S					Ac		B			-0.364307		Mm-Wild,1	A	B	C	D	E	F	G	H								-0.455627
Ac	ns	S	ns				Ac	ns	ns	ns				Ac	ns	S	ns				Mm-Wild		B			-0.473398		Ac,1			C	D	E	F	G	H								-0.719187
Ap	ns	S	ns	ns			Ap	ns	ns	ns	ns			Ap	ns	S	ns	ns			Mm-UKY			C		-1.04631		Ap,1		B	C	D	E	F	G	H								-0.421154
																												Mm-UKY,2					E	F	G	H								-0.930125
D5	Mm-uky	Mm-kenya	Mm-wild	Ac	Ap		D10	Mm-uky	Mm-kenya	Mm-wild	Ac	Ap		D15	Mm-uky	Mm-kenya	Mm-wild	Ac	Ap									Mm-Kenya,2	A	B	C	D												0.35655
Mm-uky							Mm-uky							Mm-uky							No relation							Mm-Wild,2	A	B	C	D	E	F	G	H								-0.568003
Mm-kenya	S						Mm-kenya	ns						Mm-kenya	S													Ac,2	A	B	C	D	E	F	G	H								-0.349112
Mm-wild	ns	ns					Mm-wild	ns	ns					Mm-wild	ns	ns												Ap,2			C	D	E	F	G	H								-0.530452
Ac	ns	ns	ns				Ac	ns	ns	ns				Ac	ns	ns	ns											Mm-UKY,3								H								-1.32057
Ap	ns	ns	ns	ns			Ap	ns	ns	ns	ns			Ap	ns	ns	ns	ns										Mm-Kenya,3	A	B	C													0.421851
																												Mm-Wild,3						F	G	H								-1.16368
D20	Mm-uky	Mm-kenya	Mm-wild	Ac	Ap																							Ac,3	A	B	C	D	E	F										0.111858
Mm-uky																												Ap,3				D	E	F	G	H								-0.705198
Mm-kenya	S																											Mm-UKY,5				D	E	F	G	H								-0.854327
Mm-wild	ns	ns																										Mm-Kenya,5	A	B														0.566984
Ac	ns	ns	ns																									Mm-Wild,5	A	B	C	D	E	F	G	H								-0.573556
Ap	ns	ns	ns	ns																								Ac,5	A	B	C	D	E	F	G	H								-0.509472
																												Ap,5	A	B	C	D	E	F	G									-0.136994
																												Mm-UKY,10							G	H								-1.15735
																												Mm-Kenya,10	A	B	C	D	E	F	G	H								-0.242497
																												Mm-Wild,10	A	B	C	D	E	F	G	H								-0.364502
																												Ac,10	A	B	C	D	E	F	G	H								-0.183938
																												Ap,10	A	B	C	D	E	F	G	H								-0.342282
																												Mm-UKY,15								H								-1.17939
																												Mm-Kenya,15	A															0.563894
																												Mm-Wild,15	A	B	C	D	E	F	G	H								-0.327733
																												Ac,15		B	C	D	E	F	G	H								-0.433349
																												Ap,15	A	B	C	D	E	F	G	H								-0.306234
																												Mm-UKY,20						F	G	H								-0.876923
																												Mm-Kenya,20	A	B	C	D	E											0.17031
																												Mm-Wild,20	A	B	C	D	E	F	G									0.139309
																												Ac,20		B	C	D	E	F	G	H								-0.466949
																												Ap,20	A	B	C	D	E	F	G									0.040951
CXCL1	not quantified in Ac
D1	Mm-uky	Mm-kenya	Mm-wild	Ac	Ap		D2	Mm-uky	Mm-kenya	Mm-wild	Ac	Ap		D3	Mm-uky	Mm-kenya	Mm-wild	Ac	Ap		Level					Least Sq Mean		Level																Least Sq Mean
Mm-uky							Mm-uky							Mm-uky							Mm-Kenya	A				0.44755		Mm-UKY,1	A	B	C	D												0.241511
Mm-kenya							Mm-kenya							Mm-kenya							Mm-UKY		B			-0.0635385		Mm-Kenya,1	A															0.84945
Mm-wild							Mm-wild							Mm-wild							Mm-Wild		B			-0.279827		Mm-Wild,1	A	B	C	D	E	F	G									-0.134413
Ac							Ac							Ac							Ap			C		-0.871016		Ap,1			C		E	F	G									-0.435267
Ap							Ap							Ap														Mm-UKY,2	A	B	C	D	E	F										0.040975
																												Mm-Kenya,2	A	B														0.762978
D5	Mm-uky	Mm-kenya	Mm-wild	Ac	Ap		D10	Mm-uky	Mm-kenya	Mm-wild	Ac	Ap		D15	Mm-uky	Mm-kenya	Mm-wild	Ac	Ap		Non-regenerator > regenerator							Mm-Wild,2	A	B	C	D	E	F	G									-0.156473
Mm-uky							Mm-uky							Mm-uky														Ap,2							G									-1.03308
Mm-kenya							Mm-kenya							Mm-kenya														Mm-UKY,3	A	B	C	D	E	F	G									-0.102456
Mm-wild							Mm-wild							Mm-wild														Mm-Kenya,3	A	B	C	D												0.451433
Ac							Ac							Ac														Mm-Wild,3			C	D	E	F	G									-0.56044
Ap							Ap							Ap														Ap,3						F	G									-0.897054
																												Mm-UKY,5	A	B	C	D	E	F	G									-0.156459
D20	Mm-uky	Mm-kenya	Mm-wild	Ac	Ap																							Mm-Kenya,5	A	B	C	D												0.293072
Mm-uky																												Mm-Wild,5					E	F	G									-1.2158
Mm-kenya																												Ap,5							G									-0.961922
Mm-wild																												Mm-UKY,10		B	C	D	E	F	G									-0.139262
Ac																												Mm-Kenya,10	A	B	C	D
Ap																												Mm-Wild,10	A	B	C	D	E	F	G
																												Ap,10							G
																												Mm-UKY,15		B	C	D	E	F
																												Mm-Kenya,15	A	B		D												0.407048
																												Mm-Wild,15	A	B	C	D												0.308008
																												Ap,15					E	F	G									-0.728901
																												Mm-UKY,20	A	B	C	D	E											-0.031239
																												Mm-Kenya,20	A	B	C	D												0.134019
																												Mm-Wild,20	A	B	C	D	E	F	G									0.054367
																												Ap,20						F	G									-1.02741

## Sheet: FIGURE S2 B
FIG 2 POSTHOC STATS
IL-1a	All data above limit of detection
D1	Mm-uky	Mm-kenya	Mm-wild	Ac	Ap		D2	Mm-uky	Mm-kenya	Mm-wild	Ac	Ap		D3	Mm-uky	Mm-kenya	Mm-wild	Ac	Ap
Mm-uky							Mm-uky							Mm-uky
Mm-kenya							Mm-kenya							Mm-kenya
Mm-wild							Mm-wild							Mm-wild
Ac							Ac							Ac
Ap							Ap							Ap
D5	Mm-uky	Mm-kenya	Mm-wild	Ac	Ap		D10	Mm-uky	Mm-kenya	Mm-wild	Ac	Ap		D15	Mm-uky	Mm-kenya	Mm-wild	Ac	Ap
Mm-uky							Mm-uky							Mm-uky
Mm-kenya							Mm-kenya							Mm-kenya
Mm-wild							Mm-wild							Mm-wild
Ac							Ac							Ac
Ap							Ap							Ap
D20	Mm-uky	Mm-kenya	Mm-wild	Ac	Ap
Mm-uky
Mm-kenya
Mm-wild
Ac
Ap
IL-1b	Measured in all groups																				Group							Group*Day
D1	Mm-uky	Mm-kenya	Mm-wild	Ac	Ap		D2	Mm-uky	Mm-kenya	Mm-wild	Ac	Ap		D3	Mm-uky	Mm-kenya	Mm-wild	Ac	Ap		Level					Least Sq Mean		Level																Least Sq Mean
Mm-uky							Mm-uky							Mm-uky							Mm-Wild	A				0.380346		Mm-UKY,1	A	B	C	D												0.371759
Mm-kenya	ns						Mm-kenya	ns						Mm-kenya	ns						Ac		B			0.0997899		Mm-Kenya,1	A	B	C	D	E	F										0.098252
Mm-wild	ns	ns					Mm-wild	ns	ns					Mm-wild	ns	ns					Mm-UKY		B			0.0650634		Mm-Wild,1	A	B	C													0.579966
Ac	ns	ns	ns				Ac	ns	ns	ns				Ac	ns	ns	ns				Mm-Kenya			C		-0.345324		Ac,1	A	B	C	D	E	F										0.14641
Ap	ns	S	ns	ns			Ap	S	S	S	S			Ap	S	S	S	S			Ap				D	-0.643342		Ap,1				D	E	F	G									-0.18708
																												Mm-UKY,2	A	B	C													0.572884
D5	Mm-uky	Mm-kenya	Mm-wild	Ac	Ap		D10	Mm-uky	Mm-kenya	Mm-wild	Ac	Ap		D15	Mm-uky	Mm-kenya	Mm-wild	Ac	Ap		no relation							Mm-Kenya,2	A	B	C	D												0.44783
Mm-uky							Mm-uky							Mm-uky														Mm-Wild,2	A															0.873205
Mm-kenya	ns						Mm-kenya	ns						Mm-kenya	S													Ac,2	A	B	C	D												0.347029
Mm-wild	ns	ns					Mm-wild	ns	S					Mm-wild	ns	S												Ap,2									I	J	K	L				-0.869647
Ac	ns	ns	ns				Ac	ns	S	ns				Ac	ns	S	ns											Mm-UKY,3	A	B	C	D												0.302842
Ap	ns	ns	ns	ns			Ap	S	ns	S	S			Ap	ns	S	S	S										Mm-Kenya,3	A	B	C	D	E											0.177594
																												Mm-Wild,3	A	B														0.669109
D20	Mm-uky	Mm-kenya	Mm-wild	Ac	Ap																							Ac,3	A	B	C	D												0.26922
Mm-uky																												Ap,3						F	G	H	I	J						-0.479714
Mm-kenya	ns																											Mm-UKY,5	A	B	C	D												0.278464
Mm-wild	ns	S																										Mm-Kenya,5	A	B	C	D	E	F										0.107732
Ac	ns	S	ns																									Mm-Wild,5	A	B	C	D	E											0.251497
Ap	S	ns	S	S																								Ac,5	A	B	C	D	E											0.223849
																												Ap,5				D	E	F	G									-0.187506
																												Mm-UKY,10					E	F	G	H	I	J	K					-0.50657
																												Mm-Kenya,10											K	L				-1.16503
																												Mm-Wild,10	A	B	C	D	E	F										0.150644
																												Ac,10			C	D	E	F	G	H								-0.147364
																												Ap,10										J	K	L				-1.02483
																												Mm-UKY,15				D	E	F	G									-0.142164
																												Mm-Kenya,15												L				-1.27981
																												Mm-Wild,15		B	C	D	E	F										0.016634
																												Ac,15			C	D	E	F										-0.052104
																												Ap,15							G	H	I	J	K	L				-0.706854
																												Mm-UKY,20					E	F	G	H	I							-0.42177
																												Mm-Kenya,20								H	I	J	K	L				-0.803839
																												Mm-Wild,20	A	B	C	D	E	F										0.121368
																												Ac,20			C	D	E	F										-0.088509
																												Ap,20											K	L				-1.04777
IL-2	Measured in all groups																				Group							Group*Day
D1	Mm-uky	Mm-kenya	Mm-wild	Ac	Ap		D2	Mm-uky	Mm-kenya	Mm-wild	Ac	Ap		D3	Mm-uky	Mm-kenya	Mm-wild	Ac	Ap		Level					Least Sq Mean		Level																Least Sq Mean
Mm-uky							Mm-uky							Mm-uky							Ap	A				0.590255		Mm-UKY,1						F	G	H	I	J						-0.183952
Mm-kenya	S						Mm-kenya	ns						Mm-kenya	ns						Mm-Wild		B			0.133178		Mm-Kenya,1											K					-0.951558
Mm-wild	ns	S					Mm-wild	ns	S					Mm-wild	ns	S					Ac			C		-0.0939502		Mm-Wild,1				D	E	F	G	H								0.053557
Ac	ns	S	ns				Ac	ns	ns	ns				Ac	ns	ns	ns				Mm-UKY			C		-0.153838		Ac,1						F	G	H	I	J						-0.161203
Ap	S	S	S	S			Ap	S	S	ns	S			Ap	S	S	S	S			Mm-Kenya				D	-0.548089		Ap,1		B														0.914693
																												Mm-UKY,2					E	F	G	H	I							-0.095723
D5	Mm-uky	Mm-kenya	Mm-wild	Ac	Ap		D10	Mm-uky	Mm-kenya	Mm-wild	Ac	Ap		D15	Mm-uky	Mm-kenya	Mm-wild	Ac	Ap									Mm-Kenya,2							G	H	I	J						-0.21875
Mm-uky							Mm-uky							Mm-uky							no relation							Mm-Wild,2			C	D	E	F										0.363162
Mm-kenya	ns						Mm-kenya	ns						Mm-kenya	S													Ac,2					E	F	G	H	I							-0.103644
Mm-wild	ns	ns					Mm-wild	ns	ns					Mm-wild	ns	S												Ap,2			C	D												0.470747
Ac	ns	ns	ns				Ac	ns	ns	ns				Ac	ns	S	ns											Mm-UKY,3								H	I	J						-0.308868
Ap	ns	S	ns	ns			Ap	S	S	S	S			Ap	S	S	S	S										Mm-Kenya,3									I	J	K					-0.527885
																												Mm-Wild,3				D	E	F	G	H								0.166915
D20	Mm-uky	Mm-kenya	Mm-wild	Ac	Ap																							Ac,3					E	F	G	H	I							-0.11164
Mm-uky																												Ap,3	A															1.48096
Mm-kenya	S																											Mm-UKY,5							G	H	I	J						-0.229835
Mm-wild	ns	S																										Mm-Kenya,5								H	I	J						-0.336666
Ac	ns	S	ns																									Mm-Wild,5				D	E	F	G	H	I							0.008822
Ap	ns	S	ns	ns																								Ac,5						F	G	H	I	J						-0.155654
																												Ap,5				D	E	F	G									0.22191
																												Mm-UKY,10							G	H	I	J						-0.207035
																												Mm-Kenya,10								H	I	J						-0.244048
																												Mm-Wild,10				D	E	F	G	H								0.087634
																												Ac,10						F	G	H	I	J						-0.132432
																												Ap,10		B	C													0.758355
																												Mm-UKY,15						F	G	H	I							-0.075269
																												Mm-Kenya,15											K					-0.951558
																												Mm-Wild,15				D	E	F	G	H								0.083863
																												Ac,15						F	G	H	I							-0.070583
																												Ap,15				D	E											0.338737
																												Mm-UKY,20					E	F	G	H								0.023815
																												Mm-Kenya,20										J	K					-0.606158
																												Mm-Wild,20				D	E	F	G	H								0.168294
																												Ac,20				D	E	F	G	H								0.077504
																												Ap,20					E	F	G	H								-0.053625
IL-4	Measured in all groups																				Group							Group*Day
D1	Mm-uky	Mm-kenya	Mm-wild	Ac	Ap		D2	Mm-uky	Mm-kenya	Mm-wild	Ac	Ap		D3	Mm-uky	Mm-kenya	Mm-wild	Ac	Ap		Level					Least Sq Mean		Level																Least Sq Mean
Mm-uky							Mm-uky							Mm-uky							Mm-Wild	A				0.118788		Mm-UKY,1			C	D	E	F	G	H	I	J						-0.273085
Mm-kenya	ns						Mm-kenya	ns						Mm-kenya	ns						Ac		B			-0.284173		Mm-Kenya,1					E	F	G	H	I	J						-0.380606
Mm-wild	ns	S					Mm-wild	ns	ns					Mm-wild	S	ns					Ap		B			-0.285823		Mm-Wild,1	A	B	C	D												0.147429
Ac	ns	ns	ns				Ac	ns	ns	ns				Ac	ns	ns	S				Mm-UKY		B			-0.288864		Ac,1				D	E	F	G	H	I	J						-0.312083
Ap	ns	ns	ns	ns			Ap	ns	ns	ns	ns			Ap	ns	ns	S	ns			Mm-Kenya		B			-0.349872		Ap,1					E	F	G	H	I	J						-0.327213
																												Mm-UKY,2		B	C	D	E	F	G									-0.109676
D5	Mm-uky	Mm-kenya	Mm-wild	Ac	Ap		D10	Mm-uky	Mm-kenya	Mm-wild	Ac	Ap		D15	Mm-uky	Mm-kenya	Mm-wild	Ac	Ap									Mm-Kenya,2		B	C	D	E	F	G									-0.0856895
Mm-uky							Mm-uky							Mm-uky							no relation							Mm-Wild,2	A	B	C													0.211903
Mm-kenya	ns						Mm-kenya	ns						Mm-kenya	S													Ac,2		B	C	D	E	F	G									-0.100934
Mm-wild	ns	ns					Mm-wild	ns	ns					Mm-wild	ns	ns												Ap,2	A	B														0.139759
Ac	ns	ns	ns				Ac	ns	ns	S				Ac	ns	ns	ns											Mm-UKY,3									I	J						-0.675964
Ap	ns	ns	ns	ns			Ap	ns	ns	S	ns			Ap	ns	S	ns	ns										Mm-Kenya,3		B	C	D	E	F	G	H	I	J						-0.252645
																												Mm-Wild,3	A	B	C	D	E											0.099308
D20	Mm-uky	Mm-kenya	Mm-wild	Ac	Ap																							Ac,3						F	G	H	I	J						-0.479661
Mm-uky																												Ap,3										J						-0.631331
Mm-kenya	ns																											Mm-UKY,5		B	C	D	E	F										-0.047101
Mm-wild	S	S																										Mm-Kenya,5				D	E	F	G	H	I	J						-0.29589
Ac	S	S	S																									Mm-Wild,5		B	C	D	E	F										-0.0388325
Ap	ns	ns	S	ns																								Ac,5		B	C	D	E	F	G	H								-0.161842
																												Ap,5			C	D	E	F	G	H								-0.203967
																												Mm-UKY,10		B	C	D	E	F	G	H								-0.145818
																												Mm-Kenya,10		B	C	D	E	F	G	H	I							-0.202301
																												Mm-Wild,10	A	B	C	D												0.119474
																												Ac,10						F	G	H	I	J						-0.459978
																												Ap,10							G	H	I	J						-0.494661
																												Mm-UKY,15		B	C	D	E	F	G									-0.181848
																												Mm-Kenya,15										J						-0.667461
																												Mm-Wild,15		B	C	D	E	F	G	H	I	J						-0.242339
																												Ac,15					E	F	G	H	I	J						-0.348165
																												Ap,15		B	C	D	E	F										-0.0715026
																												Mm-UKY,20									I	J						-0.588556
																												Mm-Kenya,20								H	I	J						-0.564514
																												Mm-Wild,20	A															0.534572
																												Ac,20		B	C	D	E	F										-0.12655
																												Ap,20						F	G	H	I	J						-0.411843
IL-5	Could not be measured in Ac tissue																				Group							Group*Day
D1	Mm-uky	Mm-kenya	Mm-wild	Ac	Ap		D2	Mm-uky	Mm-kenya	Mm-wild	Ac	Ap		D3	Mm-uky	Mm-kenya	Mm-wild	Ac	Ap		Level					Least Sq Mean		Level																Least Sq Mean
Mm-uky							Mm-uky							Mm-uky							Mm-Wild	A				-0.203125		Mm-UKY,1	A	B	C													-0.244516
Mm-kenya	ns						Mm-kenya	ns						Mm-kenya	ns						Ap		B			-0.517575		Mm-Kenya,1	A	B	C	D	E											-0.373493
Mm-wild	ns	ns					Mm-wild	ns	ns					Mm-wild	ns	ns					Mm-UKY		B	C		-0.549424		Mm-Wild,1	A	B	C													-0.124054
Ac							Ac							Ac							Mm-Kenya			C		-0.647201		Ap,1			C	D	E	F										-0.597915
Ap	ns	ns	ns				Ap	ns	ns	S				Ap	ns	ns	ns											Mm-UKY,2	A	B	C	D	E											-0.385473
																												Mm-Kenya,2	A	B	C													-0.260499
D5	Mm-uky	Mm-kenya	Mm-wild	Ac	Ap		D10	Mm-uky	Mm-kenya	Mm-wild	Ac	Ap		D15	Mm-uky	Mm-kenya	Mm-wild	Ac	Ap									Mm-Wild,2	A	B														-0.066563
Mm-uky							Mm-uky							Mm-uky							no relation							Ap,2			C	D	E	F										-0.567051
Mm-kenya	ns						Mm-kenya	ns						Mm-kenya	ns													Mm-UKY,3	A	B	C	D	E	F										-0.41354
Mm-wild	S	ns					Mm-wild	ns	ns					Mm-wild	S	ns												Mm-Kenya,3			C	D	E	F										-0.678987
Ac							Ac							Ac														Mm-Wild,3	A	B	C													-0.138581
Ap	S	ns	S				Ap	ns	ns	ns				Ap	ns	ns	S											Ap,3		B	C	D	E	F										-0.51976
																												Mm-UKY,5					E	F										-0.877784
D20	Mm-uky	Mm-kenya	Mm-wild	Ac	Ap																							Mm-Kenya,5	A	B	C	D	E											-0.382494
Mm-uky																												Mm-Wild,5	A	B	C	D												-0.282526
Mm-kenya	S																											Ap,5	A															0.030786
Mm-wild	ns	S																										Mm-UKY,10		B	C	D	E	F										-0.579871
Ac																												Mm-Kenya,10		B	C	D	E	F										-0.627782
Ap	ns	S	ns																									Mm-Wild,10	A	B	C	D	E	F										-0.399439
																												Ap,10						F										-0.866781
																												Mm-UKY,15						F										-0.877784
																												Mm-Kenya,15				D	E	F										-0.791482
																												Mm-Wild,15	A	B	C	D												-0.283506
																												Ap,15					E	F										-0.788064
																												Mm-UKY,20		B	C	D	E	F										-0.466998
																												Mm-Kenya,20							G									-1.41567
																												Mm-Wild,20	A	B	C													-0.127205
																												Ap,20	A	B	C													-0.314245
IL-6	Measured in all groups																				Group							Group*Day
D1	Mm-uky	Mm-kenya	Mm-wild	Ac	Ap		D2	Mm-uky	Mm-kenya	Mm-wild	Ac	Ap		D3	Mm-uky	Mm-kenya	Mm-wild	Ac	Ap		Level					Least Sq Mean		Level																Least Sq Mean
Mm-uky							Mm-uky							Mm-uky							Mm-UKY	A				0.616111		Mm-UKY,1	A															1.5639
Mm-kenya	S						Mm-kenya	ns						Mm-kenya	S						Mm-Wild	A				0.551096		Mm-Kenya,1			C	D	E	F	G									0.702962
Mm-wild	ns	ns					Mm-wild	ns	ns					Mm-wild	ns	ns					Ac		B			0.254963		Mm-Wild,1	A	B	C	D												1.02908
Ac	S	ns	S				Ac	S	S	S				Ac	S	ns	ns				Mm-Kenya			C		-0.0429658		Ac,1							G	H	I	J	K	L				0.13982
Ap	S	S	S	ns			Ap	S	S	S	ns			Ap	S	ns	ns	ns			Ap			C		-0.128024		Ap,1								H	I	J	K	L				0.052013
																												Mm-UKY,2	A	B														1.42416
D5	Mm-uky	Mm-kenya	Mm-wild	Ac	Ap		D10	Mm-uky	Mm-kenya	Mm-wild	Ac	Ap		D15	Mm-uky	Mm-kenya	Mm-wild	Ac	Ap		no relation							Mm-Kenya,2		B	C	D	E	F										0.82249
Mm-uky							Mm-uky							Mm-uky														Mm-Wild,2	A	B	C	D												1.09778
Mm-kenya	S						Mm-kenya	ns						Mm-kenya	S													Ac,2					E	F	G	H	I	J						0.335496
Mm-wild	ns	ns					Mm-wild	ns	ns					Mm-wild	ns	S												Ap,2						F	G	H	I							0.313304
Ac	S	ns	ns				Ac	S	S	ns				Ac	S	S	ns											Mm-UKY,3	A	B	C													1.16535
Ap	S	ns	ns	ns			Ap	ns	ns	S	S			Ap	ns	S	ns	ns										Mm-Kenya,3				D	E	F	G	H								0.480068
																												Mm-Wild,3		B	C	D	E	F	G									0.77153
D20	Mm-uky	Mm-kenya	Mm-wild	Ac	Ap																							Ac,3						F	G	H	I	J	K					0.23947
Mm-uky																												Ap,3						F	G	H	I	J						0.288757
Mm-kenya	S																											Mm-UKY,5	A	B	C	D	E											0.949775
Mm-wild	ns	S																										Mm-Kenya,5						F	G	H	I	J	K					0.276351
Ac	ns	S	ns																									Mm-Wild,5				D	E	F	G	H	I							0.472068
Ap	S	ns	S	S																								Ac,5							G	H	I	J	K					0.188907
																												Ap,5							G	H	I	J						0.253532
																												Mm-UKY,10												L	M	N		-0.471875
																												Mm-Kenya,10													M	N	O	-0.527886
																												Mm-Wild,10								H	I	J	K	L	M			0.015757
																												Ac,10						F	G	H	I	J	K					0.301322
																												Ap,10														N	O	-0.928017
																												Mm-UKY,15											K	L	M			-0.224667
																												Mm-Kenya,15															O	-1.08058
																												Mm-Wild,15						F	G	H	I	J	K					0.193453
																												Ac,15						F	G	H	I							0.325164
																												Ap,15										J	K	L	M			-0.14843
																												Mm-UKY,20									I	J	K	L	M			-0.093854
																												Mm-Kenya,20														N	O	-0.974168
																												Mm-Wild,20					E	F	G	H	I	J	K					0.277998
																												Ac,20							G	H	I	J	K					0.254563
																												Ap,20														N	O	-0.727325
IL-12	Measured in all groups																				Gorup							Gorup*Day
D1	Mm-uky	Mm-kenya	Mm-wild	Ac	Ap		D2	Mm-uky	Mm-kenya	Mm-wild	Ac	Ap		D3	Mm-uky	Mm-kenya	Mm-wild	Ac	Ap		Level					Least Sq Mean		Level																Least Sq Mean
Mm-uky							Mm-uky							Mm-uky							Ap	A				0.663661		Mm-UKY,1				D	E	F	G									-0.003759
Mm-kenya	S						Mm-kenya	ns						Mm-kenya	ns						Mm-Wild		B			0.0463184		Mm-Kenya,1								H	I	J	K	L				-0.74822
Mm-wild	ns	S					Mm-wild	ns	ns					Mm-wild	ns	ns					Mm-UKY			C		-0.254848		Mm-Wild,1			C	D	E	F										0.138998
Ac	S	ns	S				Ac	S	S	S				Ac	ns	ns	S				Ac			C		-0.377731		Ac,1								H	I	J	K	L				-0.815309
Ap	S	S	S	S			Ap	ns	ns	ns	S			Ap	S	S	S	S			Mm-Kenya			C		-0.440042		Ap,1	A	B														1.16018
																												Mm-UKY,2			C	D	E	F										0.177984
D5	Mm-uky	Mm-kenya	Mm-wild	Ac	Ap		D10	Mm-uky	Mm-kenya	Mm-wild	Ac	Ap		D15	Mm-uky	Mm-kenya	Mm-wild	Ac	Ap		wild > lab							Mm-Kenya,2			C	D	E											0.417585
Mm-uky							Mm-uky							Mm-uky														Mm-Wild,2			C	D	E	F										0.165975
Mm-kenya	S						Mm-kenya	ns						Mm-kenya	ns													Ac,2							G	H	I	J	K	L				-0.695296
Mm-wild	ns	S					Mm-wild	ns	ns					Mm-wild	S	S												Ap,2		B	C	D												0.633197
Ac	ns	ns	S				Ac	S	S	ns				Ac	S	S	ns											Mm-UKY,3					E	F	G	H	I							-0.120075
Ap	ns	S	ns	S			Ap	ns	ns	ns	S			Ap	S	S	ns	ns										Mm-Kenya,3					E	F	G	H	I							-0.167933
																												Mm-Wild,3			C	D	E	F										0.16344
D20	Mm-uky	Mm-kenya	Mm-wild	Ac	Ap																							Ac,3								H	I	J	K	L				-0.815309
Mm-uky																												Ap,3	A															1.32606
Mm-kenya	ns																											Mm-UKY,5					E	F	G	H	I	J						-0.251447
Mm-wild	ns	S																										Mm-Kenya,5											K	L				-1.01144
Ac	S	S	ns																									Mm-Wild,5			C	D	E	F	G									0.051047
Ap	S	S	ns	ns																								Ac,5								H	I	J	K	L				-0.815309
																												Ap,5					E	F										3.8858e-16
																												Mm-UKY,10					E	F	G	H	I	J						-0.23271
																												Mm-Kenya,10			C	D	E	F										0.052659
																												Mm-Wild,10					E	F	G	H	I	J	K					-0.244459
																												Ac,10								H	I	J	K	L				-0.815309
																												Ap,10			C	D	E											0.262519
																												Mm-UKY,15												L				-0.952989
																												Mm-Kenya,15										J	K	L				-0.845248
																												Mm-Wild,15				D	E	F	G	H								-0.049414
																												Ac,15		B	C	D												0.64936
																												Ap,15			C	D												0.597386
																												Mm-UKY,20						F	G	H	I	J	K	L				-0.400938
																												Mm-Kenya,20									I	J	K	L				-0.777697
																												Mm-Wild,20			C	D	E	F	G									0.098642
																												Ac,20		B	C													0.66305
																												Ap,20		B	C													0.666283
IL-17	Unmeasured in Mm-wild and Ac																											Group*Day
D1	Mm-uky	Mm-kenya	Mm-wild	Ac	Ap		D2	Mm-uky	Mm-kenya	Mm-wild	Ac	Ap		D3	Mm-uky	Mm-kenya	Mm-wild	Ac	Ap		Level					Least Sq Mean		Level																Least Sq Mean
Mm-uky							Mm-uky							Mm-uky							Ap	A				0.566018		Mm-UKY,1			C	D	E	F										-0.628191
Mm-kenya	ns						Mm-kenya	ns						Mm-kenya	ns						Mm-Kenya		B			-0.713078		Mm-Kenya,1					E	F										-1.0655
Mm-wild							Mm-wild							Mm-wild							Mm-UKY		B			-0.773343		Ap,1	A															0.789528
Ac							Ac							Ac														Mm-UKY,2				D	E	F										-0.929962
Ap	S	S					Ap	S	S					Ap	S	S												Mm-Kenya,2		B	C	D												-0.437437
																												Ap,2	A															0.845308
D5	Mm-uky	Mm-kenya	Mm-wild	Ac	Ap		D10	Mm-uky	Mm-kenya	Mm-wild	Ac	Ap		D15	Mm-uky	Mm-kenya	Mm-wild	Ac	Ap		regenerator > non-regenerator							Mm-UKY,3				D	E	F										-0.929962
Mm-uky							Mm-uky							Mm-uky														Mm-Kenya,3		B	C	D												-0.449444
Mm-kenya	S						Mm-kenya	S						Mm-kenya	S													Ap,3	A															0.681611
Mm-wild							Mm-wild							Mm-wild														Mm-UKY,5			C	D												-0.460651
Ac							Ac							Ac														Mm-Kenya,5					E	F										-1.0655
Ap	S	S					Ap	S	ns					Ap	S	S												Ap,5		B														-0.001274
																												Mm-UKY,10				D	E	F										-0.929962
D20	Mm-uky	Mm-kenya	Mm-wild	Ac	Ap																							Mm-Kenya,10		B	C													-0.242
Mm-uky																												Ap,10		B														4.996e-16
Mm-kenya	ns																											Mm-UKY,15			C	D	E											-0.60471
Mm-wild																												Mm-Kenya,15						F										-1.0655
Ac																												Ap,15	A															0.794352
Ap	S	S																										Mm-UKY,20					E	F										-0.929962
																												Mm-Kenya,20			C	D	E	F										-0.666164
																												Ap,20	A															0.852599
CCL2 (MCP-1)	Unmeasured in Ac																				Group							Group*Day
D1	Mm-uky	Mm-kenya	Mm-wild	Ac	Ap		D2	Mm-uky	Mm-kenya	Mm-wild	Ac	Ap		D3	Mm-uky	Mm-kenya	Mm-wild	Ac	Ap		Level					Least Sq Mean		Level																Least Sq Mean
Mm-uky							Mm-uky							Mm-uky							Mm-Wild	A				0.647417		Mm-UKY,1	A	B	C	D												0.729481
Mm-kenya	ns						Mm-kenya	ns						Mm-kenya	ns						Mm-UKY		B			0.0544058		Mm-Kenya,1	A	B	C	D												0.722538
Mm-wild	ns	ns					Mm-wild	ns	ns					Mm-wild	ns	ns					Mm-Kenya		B			-0.0323451		Mm-Wild,1	A	B														1.11071
Ac							Ac							Ac							Ap			C		-0.473217		Ap,1						F	G	H	I	J	K					-0.197395
Ap	S	S	S				Ap	S	S	S				Ap	ns	ns	S											Mm-UKY,2	A	B	C	D	E											0.534369
																												Mm-Kenya,2	A	B	C	D												0.684087
D5	Mm-uky	Mm-kenya	Mm-wild	Ac	Ap		D10	Mm-uky	Mm-kenya	Mm-wild	Ac	Ap		D15	Mm-uky	Mm-kenya	Mm-wild	Ac	Ap		non-regenerator > regenerator							Mm-Wild,2	A															1.26067
Mm-uky							Mm-uky							Mm-uky														Ap,2									I	J	K	L				-0.590299
Mm-kenya	ns						Mm-kenya	ns						Mm-kenya	S													Mm-UKY,3		B	C	D	E	F	G	H								0.284548
Mm-wild	ns	ns					Mm-wild	ns	ns					Mm-wild	ns	S												Mm-Kenya,3		B	C	D	E	F	G									0.369038
Ac							Ac							Ac														Mm-Wild,3	A	B	C													0.901001
Ap	ns	ns	ns				Ap	ns	ns	S				Ap	S	ns	S											Ap,3						F	G	H	I	J						-0.181739
																												Mm-UKY,5				D	E	F	G	H	I	J						-0.014567
D20	Mm-uky	Mm-kenya	Mm-wild	Ac	Ap																							Mm-Kenya,5			C	D	E	F	G	H								0.198429
Mm-uky																												Mm-Wild,5		B	C	D	E	F	G	H								0.292766
Mm-kenya	ns																											Ap,5				D	E	F	G	H								0.141088
Mm-wild	S	S																										Mm-UKY,10							G	H	I	J	K	L				-0.362705
Ac																												Mm-Kenya,10								H	I	J	K	L				-0.475547
Ap	ns	ns	S																									Mm-Wild,10		B	C	D	E	F	G	H								0.2378
																												Ap,10											K	L				-0.777456
																												Mm-UKY,15					E	F	G	H	I	J	K					-0.177812
																												Mm-Kenya,15												L				-0.987403
																												Mm-Wild,15			C	D	E	F	G	H	I							0.14212
																												Ap,15												L				-0.844075
																												Mm-UKY,20									I	J	K	L				-0.612473
																												Mm-Kenya,20										J	K	L				-0.737557
																												Mm-Wild,20	A	B	C	D	E	F										0.586846
																												Ap,20												L				-0.862646
CCL3 (MIP1a)	measured in all groups																				Group							Group*Day
D1	Mm-uky	Mm-kenya	Mm-wild	Ac	Ap		D2	Mm-uky	Mm-kenya	Mm-wild	Ac	Ap		D3	Mm-uky	Mm-kenya	Mm-wild	Ac	Ap		Level					Least Sq Mean		Level																Least Sq Mean
Mm-uky							Mm-uky							Mm-uky							Mm-UKY	A				1.4525		Mm-UKY,1	A	B	C	D												2.12399
Mm-kenya	ns						Mm-kenya	ns						Mm-kenya	ns						Ac	A				1.38699		Mm-Kenya,1	A	B	C													2.16373
Mm-wild	ns	ns					Mm-wild	ns	ns					Mm-wild	ns	ns					Mm-Kenya	A	B			1.28514		Mm-Wild,1		B	C	D	E	F	G	H	I	J						1.46839
Ac	ns	ns	ns				Ac	ns	ns	ns				Ac	ns	ns	ns				Ap		B			1.15831		Ac,1	A	B	C	D	E											1.84123
Ap	ns	S	ns	ns			Ap	S	S	ns	ns			Ap	ns	ns	ns	ns			Mm-Wild		B			1.1342		Ap,1				D	E	F	G									1.47679
																												Mm-UKY,2	A	B														2.21803
D5	Mm-uky	Mm-kenya	Mm-wild	Ac	Ap		D10	Mm-uky	Mm-kenya	Mm-wild	Ac	Ap		D15	Mm-uky	Mm-kenya	Mm-wild	Ac	Ap									Mm-Kenya,2	A															2.27408
Mm-uky							Mm-uky							Mm-uky							lab > wild							Mm-Wild,2	A	B	C	D	E	F	G	H	I							1.53852
Mm-kenya	ns						Mm-kenya	ns						Mm-kenya	ns													Ac,2	A	B	C													2.16655
Mm-wild	ns	ns					Mm-wild	ns	ns					Mm-wild	ns	ns												Ap,2			C	D	E	F	G									1.51269
Ac	ns	ns	ns				Ac	ns	ns	ns				Ac	ns	ns	ns											Mm-UKY,3	A	B	C	D												2.12289
Ap	ns	ns	ns	ns			Ap	ns	ns	ns	ns			Ap	ns	S	ns	S										Mm-Kenya,3	A	B	C													2.14875
																												Mm-Wild,3	A	B	C	D	E	F	G	H	I							1.53852
D20	Mm-uky	Mm-kenya	Mm-wild	Ac	Ap																							Ac,3	A	B	C	D												2.14564
Mm-uky																												Ap,3	A	B	C	D	E	F										1.65716
Mm-kenya	ns																											Mm-UKY,5	A	B	C	D	E											1.95358
Mm-wild	ns	S																										Mm-Kenya,5	A	B	C	D	E											1.86465
Ac	ns	ns	ns																									Mm-Wild,5					E	F	G	H	I	J	K					1.30901
Ap	ns	ns	ns	ns																								Ac,5	A	B	C	D	E											2.06768
																												Ap,5					E	F	G	H								1.41989
																												Mm-UKY,10							G	H	I	J	K	L				0.898181
																												Mm-Kenya,10												L	M	N		0.49442
																												Mm-Wild,10										J	K	L	M	N		0.661395
																												Ac,10							G	H	I	J	K	L				0.946694
																												Ap,10									I	J	K	L				0.85616
																												Mm-UKY,15												L	M	N		0.306008
																												Mm-Kenya,15														N		-0.040807
																												Mm-Wild,15											K	L	M	N		0.510422
																												Ac,15													M	N		0.145169
																												Ap,15								H	I	J	K	L				0.87333
																												Mm-UKY,20												L	M	N		0.544804
																												Mm-Kenya,20														N		0.091125
																												Mm-Wild,20						F	G	H	I	J	K	L	M			0.913176
																												Ac,20												L	M	N		0.395934
																												Ap,20												L	M	N		0.312158
CCL5 (RANTES)	unmeasured in AP and AC																				Group							Group*Day
D1	Mm-uky	Mm-kenya	Mm-wild	Ac	Ap		D2	Mm-uky	Mm-kenya	Mm-wild	Ac	Ap		D3	Mm-uky	Mm-kenya	Mm-wild	Ac	Ap
Mm-uky							Mm-uky							Mm-uky
Mm-kenya	ns						Mm-kenya	ns						Mm-kenya	ns
Mm-wild	S	S					Mm-wild	ns	ns					Mm-wild	S	S
Ac							Ac							Ac
Ap							Ap							Ap
D5	Mm-uky	Mm-kenya	Mm-wild	Ac	Ap		D10	Mm-uky	Mm-kenya	Mm-wild	Ac	Ap		D15	Mm-uky	Mm-kenya	Mm-wild	Ac	Ap
Mm-uky							Mm-uky							Mm-uky
Mm-kenya	S						Mm-kenya	ns						Mm-kenya	ns
Mm-wild	S	ns					Mm-wild	ns	ns					Mm-wild	ns	ns
Ac							Ac							Ac
Ap							Ap							Ap
D20	Mm-uky	Mm-kenya	Mm-wild	Ac	Ap
Mm-uky
Mm-kenya	ns
Mm-wild	ns	ns
Ac
Ap
CSF2 (GM-CSF)	Unmeasured in Ac																				Group							Group*Day
D1	Mm-uky	Mm-kenya	Mm-wild	Ac	Ap		D2	Mm-uky	Mm-kenya	Mm-wild	Ac	Ap		D3	Mm-uky	Mm-kenya	Mm-wild	Ac	Ap		Level					Least Sq Mean		Level																Least Sq Mean
Mm-uky							Mm-uky							Mm-uky							Mm-Wild	A				0.614077		Mm-UKY,1		B	C	D	E	F	G	H								0.35223
Mm-kenya	S						Mm-kenya	S						Mm-kenya	ns						Ap		B			0.0886838		Mm-Kenya,1												L	M			-0.667562
Mm-wild	ns	S					Mm-wild	ns	S					Mm-wild	ns	S					Mm-UKY		B			0.0114045		Mm-Wild,1	A	B	C	D	E											0.440844
Ac							Ac							Ac							Mm-Kenya			C		-0.361113		Ap,1			C	D	E	F	G	H	I							0.241333
Ap	ns	S	ns				Ap	S	ns	S				Ap	ns	ns	S											Mm-UKY,2	A	B	C	D												0.430359
																												Mm-Kenya,2								H	I	J	K	L				-0.179508
D5	Mm-uky	Mm-kenya	Mm-wild	Ac	Ap		D10	Mm-uky	Mm-kenya	Mm-wild	Ac	Ap		D15	Mm-uky	Mm-kenya	Mm-wild	Ac	Ap		no relation							Mm-Wild,2	A															0.980779
Mm-uky							Mm-uky							Mm-uky														Ap,2							G	H	I	J						-0.069051
Mm-kenya	S						Mm-kenya	ns						Mm-kenya	ns													Mm-UKY,3	A	B	C	D												0.426877
Mm-wild	S	ns					Mm-wild	S	S					Mm-wild	S	S												Mm-Kenya,3				D	E	F	G	H	I	J	K					-0.0505214
Ac							Ac							Ac														Mm-Wild,3	A	B														0.878224
Ap	S	ns	ns				Ap	ns	S	ns				Ap	S	S	S											Ap,3			C	D	E											0.325157
																												Mm-UKY,5										J	K	L	M			-0.477817
D20	Mm-uky	Mm-kenya	Mm-wild	Ac	Ap																							Mm-Kenya,5		B	C	D	E	F	G	H	I							0.322043
Mm-uky																												Mm-Wild,5	A	B	C													0.60427
Mm-kenya	S																											Ap,5			C	D	E	F										0.311944
Mm-wild	ns	S																										Mm-UKY,10									I	J	K	L	M			-0.192324
Ac																												Mm-Kenya,10												L	M			-0.617121
Ap	ns	S	S																									Mm-Wild,10	A	B	C	D	E	F	G									0.40085
																												Ap,10						F	G	H	I	J						-0.069051
																												Mm-UKY,15											K	L	M			-0.477817
																												Mm-Kenya,15													M			-0.667562
																												Mm-Wild,15	A	B	C	D												0.486662
																												Ap,15					E	F	G	H	I	J						-0.0504946
																												Mm-UKY,20				D	E	F	G	H	I							0.0183234
																												Mm-Kenya,20													M			-0.667562
																												Mm-Wild,20	A	B	C	D												0.506912
																												Ap,20						F	G	H	I	J						-0.069051
TNFa	Measured in all groups																				Group							Group*Day
D1	Mm-uky	Mm-kenya	Mm-wild	Ac	Ap		D2	Mm-uky	Mm-kenya	Mm-wild	Ac	Ap		D3	Mm-uky	Mm-kenya	Mm-wild	Ac	Ap		Species					Least Sq Mean		Level																Least Sq Mean
Mm-uky							Mm-uky							Mm-uky							Mm-Wild	A				6.07279		Mm-UKY,1				D	E	F	G	H								2.58115
Mm-kenya	ns						Mm-kenya	S						Mm-kenya	S						Mm-UKY		B			3.40262		Mm-Kenya,1							G	H								0.1179
Mm-wild	ns	S					Mm-wild	S	S					Mm-wild	S	S					Ap			C		1.52216		Mm-Wild,1		B	C	D	E											5.29326
Ac	ns	ns	S				Ac	S	ns	S				Ac	S	ns	S				Ac			C		1.11535		Ac,1						F	G	H								1
Ap	ns	ns	S	ns			Ap	S	ns	S	ns			Ap	S	ns	S	ns			Mm-Kenya			C		0.862782		Ap,1						F	G	H								2.35199
																												Mm-UKY,2		B														7.42223
D5	Mm-uky	Mm-kenya	Mm-wild	Ac	Ap		D10	Mm-uky	Mm-kenya	Mm-wild	Ac	Ap		D15	Mm-uky	Mm-kenya	Mm-wild	Ac	Ap		no relation							Mm-Kenya,2						F	G	H								2.03573
Mm-uky							Mm-uky							Mm-uky														Mm-Wild,2	A															15.034
Mm-kenya	S						Mm-kenya	ns						Mm-kenya	ns													Ac,2						F	G	H								1.05277
Mm-wild	ns	ns					Mm-wild	ns	ns					Mm-wild	ns	ns												Ap,2						F	G									2.46887
Ac	S	ns	ns				Ac	ns	ns	ns				Ac	ns	ns	ns											Mm-UKY,3		B	C													5.60493
Ap	S	ns	ns	ns			Ap	ns	ns	ns	ns			Ap	ns	ns	ns	ns										Mm-Kenya,3						F	G	H								1.89158
																												Mm-Wild,3	A															12.3055
D20	Mm-uky	Mm-kenya	Mm-wild	Ac	Ap																							Ac,3						F	G	H								1.26278
Mm-uky																												Ap,3							G	H								1.23273
Mm-kenya	ns																											Mm-UKY,5		B	C	D												5.335
Mm-wild	ns	ns																										Mm-Kenya,5						F	G	H								1.44212
Ac	ns	ns	ns																									Mm-Wild,5			C	D	E	F										3.9927
Ap	ns	ns	ns	ns																								Ac,5						F	G	H								1.36777
																												Ap,5						F	G									2.45597
																												Mm-UKY,10							G	H								0.861
																												Mm-Kenya,10							G	H								0.239883
																												Mm-Wild,10						F	G	H								1.65484
																												Ac,10						F	G	H								1.105
																												Ap,10							G	H								0.5479
																												Mm-UKY,15							G	H								1.15302
																												Mm-Kenya,15								H								0.1179
																												Mm-Wild,15					E	F	G	H								2.09186
																												Ac,15							G	H								1
																												Ap,15							G	H								1.18679
																												Mm-UKY,20							G	H								0.861
																												Mm-Kenya,20								H								0.194356
																												Mm-Wild,20				D	E	F	G	H								2.1373
																												Ac,20							G	H								1.01912
																												Ap,20							G	H								0.4109
IFNg	Unmeasured in Mm-uky and Ac
D1	Mm-uky	Mm-kenya	Mm-wild	Ac	Ap		D2	Mm-uky	Mm-kenya	Mm-wild	Ac	Ap		D3	Mm-uky	Mm-kenya	Mm-wild	Ac	Ap		Level					Least Sq Mean		Level																Least Sq Mean
Mm-uky							Mm-uky							Mm-uky							Mm-Wild	A				-0.0243645		Mm-Kenya,1			C	D	E	F										-0.517267
Mm-kenya	S						Mm-kenya	S						Mm-kenya	S						Ap		B			-0.319593		Mm-Wild,1	A															0.185071
Mm-wild	ns	ns					Mm-wild	ns	ns					Mm-wild	ns	S					Mm-Kenya			C		-0.550751		Ap,1	A	B	C	D	E											-0.22388
Ac	ns	S	ns				Ac	ns	ns	ns				Ac	S	ns	ns											Mm-Kenya,2					E	F										-0.65221
Ap	ns	S	ns	ns			Ap	ns	ns	ns	ns			Ap	ns	S	ns	ns										Mm-Wild,2	A	B														0.0906862
																												Ap,2		B	C	D	E											-0.349299
D5	Mm-uky	Mm-kenya	Mm-wild	Ac	Ap		D10	Mm-uky	Mm-kenya	Mm-wild	Ac	Ap		D15	Mm-uky	Mm-kenya	Mm-wild	Ac	Ap		no pattern							Mm-Kenya,3			C		E	F										-0.546917
Mm-uky							Mm-uky							Mm-uky														Mm-Wild,3	A	B	C	D	E											-0.138552
Mm-kenya	S						Mm-kenya	ns						Mm-kenya	S													Ap,3		B	C	D	E											-0.319711
Mm-wild	ns	ns					Mm-wild	ns	ns					Mm-wild	ns	ns												Mm-Kenya,5	A	B	C	D	E											-0.327633
Ac	ns	ns	ns				Ac	ns	ns	ns				Ac	ns	S	ns											Mm-Wild,5	A	B	C	D	E											-0.155553
Ap	ns	ns	ns	ns			Ap	ns	ns	ns	ns			Ap	ns	ns	ns	ns										Ap,5	A	B		D												-0.0661567
																												Mm-Kenya,10						F										-0.925184
D20	Mm-uky	Mm-kenya	Mm-wild	Ac	Ap																							Mm-Wild,10	A	B	C	D	E											-0.092523
Mm-uky																												Ap,10	A	B	C	D	E											-0.307032
Mm-kenya	S																											Mm-Kenya,15			C		E	F										-0.484891
Mm-wild	ns	ns																										Mm-Wild,15	A	B	C	D	E											-0.109131
Ac	ns	ns	ns																									Ap,15		B	C	D	E											-0.394481
Ap	ns	ns	ns	ns																								Mm-Kenya,20		B	C	D	E											-0.401158
																												Mm-Wild,20	A	B	C	D												0.0494505
																												Ap,20					E	F										-0.576593
CXCL1																					Group							Goup*Day
D1	Mm-uky	Mm-kenya	Mm-wild	Ac	Ap		D2	Mm-uky	Mm-kenya	Mm-wild	Ac	Ap		D3	Mm-uky	Mm-kenya	Mm-wild	Ac	Ap		Level					Least Sq Mean		Level																Least Sq Mean
Mm-uky							Mm-uky							Mm-uky							Mm-Wild	A				1.19439		Mm-UKY,1		B	C													1.40125
Mm-kenya	ns						Mm-kenya	S						Mm-kenya	ns						Mm-Kenya		B			0.884763		Mm-Kenya,1	A	B	C													1.70623
Mm-wild	ns	ns					Mm-wild	S	ns					Mm-wild	S	ns					Mm-UKY			C		0.394273		Mm-Wild,1	A	B	C													1.65872
Ac							Ac							Ac							Ap				D	0.208432		Ap,1					E	F	G									0.412414
Ap	S	S	S				Ap	S	S	S				Ap	S	S	S											Mm-UKY,2			C	D												1.27516
																												Mm-Kenya,2	A	B														1.91183
D5	Mm-uky	Mm-kenya	Mm-wild	Ac	Ap		D10	Mm-uky	Mm-kenya	Mm-wild	Ac	Ap		D15	Mm-uky	Mm-kenya	Mm-wild	Ac	Ap		wild > lab							Mm-Wild,2	A															2.13231
Mm-uky							Mm-uky							Mm-uky							non-regenerator > regenerator							Ap,2						F	G									0.261884
Mm-kenya	S						Mm-kenya	S						Mm-kenya	ns													Mm-UKY,3			C	D												1.19738
Mm-wild	S	ns					Mm-wild	S	ns					Mm-wild	S	S												Mm-Kenya,3	A	B	C													1.7174
Ac							Ac							Ac														Mm-Wild,3	A	B														1.93028
Ap	S	S	S				Ap	S	ns	ns				Ap	S	S	ns											Ap,3					E	F										0.492953
																												Mm-UKY,5				D	E											0.773167
D20	Mm-uky	Mm-kenya	Mm-wild	Ac	Ap																							Mm-Kenya,5		B	C													1.51751
Mm-uky																												Mm-Wild,5		B	C													1.45196
Mm-kenya	ns																											Ap,5							G	H								-1.166e-15
Mm-wild	S	S																										Mm-UKY,10									I							-0.697453
Ac																												Mm-Kenya,10						F	G									0.141519
Ap	S	ns	ns																									Mm-Wild,10					E	F	G									0.369231
																												Ap,10							G	H								-1.11e-16
																												Mm-UKY,15									I							-0.697453
																												Mm-Kenya,15								H	I							-0.395948
																												Mm-Wild,15					E	F	G									0.397914
																												Ap,15						F	G									0.24795
																												Mm-UKY,20									I							-0.492137
																												Mm-Kenya,20								H	I							-0.405206
																												Mm-Wild,20					E	F	G									0.420301
																												Ap,20							G	H								0.043822
